# Supplementary material for: Engineering and elucidation of the lipoinitiation process in nonribosomal peptide biosynthesis
Source: PubMed Central journal article supplement (PMC7804268; doi:10.1038/s41467-020-20548-8), 2021-01-12
Supplement: 41467_2020_20548_MOESM1_ESM.pdf [file 41467_2020_20548_MOESM1_ESM.pdf]

Supplementary information

## **Engineering and Elucidation of the Lipoinitiation Process in Nonribosomal Peptide Biosynthesis**

Lin Zhong<sup>1#</sup>, Xiaotong Diao<sup>1#</sup>, Na Zhang<sup>1#</sup>, Fengwei Li<sup>1</sup>, Haibo Zhou<sup>1</sup>, Hanna Chen<sup>1</sup>, Xianping Bai<sup>1</sup>,  
Xintong Ren<sup>1</sup>, Youming Zhang<sup>1\*</sup>, Dalei Wu<sup>1,2\*</sup> & Xiaoying Bian<sup>1\*</sup>

<sup>1</sup>Helmholtz International Lab for Anti-Infectives, Shandong University-Helmholtz Institute of Biotechnology, State Key Laboratory of Microbial Technology, Shandong University, Qingdao, Shandong 266237, China.

<sup>2</sup>Suzhou Research Institute, Shandong University, Suzhou, Jiangsu 215123, China.

<sup>#</sup>These authors contributed equally.

### **\*Corresponding authors**

Youming Zhang (zhangyouming@sdu.edu.cn)

Dalei Wu (dlwu@sdu.edu.cn)

Xiaoying Bian (bianxiaoying@sdu.edu.cn)

## Supplementary Tables

**Supplementary Table 1.** The  $^1\text{H}$ -NMR (600 MHz) Data of **1d**, **1e**, **1f**, **1g**, **1h** in  $\text{DMSO-}d_6$

**Supplementary Table 2.** The  $^{13}\text{C}$ -NMR (150 MHz) Data of **1d**, **1e**, **1f**, **1g**, **1h** in  $\text{DMSO-}d_6$

**Supplementary Table 3.** The  $^1\text{H}$  (600 MHz) and  $^{13}\text{C}$  NMR (150 MHz) Data of **2a** in  $\text{DMSO-}d_6$

**Supplementary Table 4.** The  $^1\text{H}$  (500 MHz) and  $^{13}\text{C}$  NMR (125 MHz) Data of **7b**, **7c** in  $\text{DMSO-}d_6$

**Supplementary Table 5.** Data collection and refinement statistics

## Supplementary Figures

**Supplementary Fig. 1.** The *in vitro* biochemical experiments of dissected RzmA-Cs and HolA-Cs domains

**Supplementary Fig. 2.** Structural determination of rhizomide derivatives **1b-1h**

**Supplementary Fig. 3.** Structural determination of holrhizin derivatives

**Supplementary Fig. 4.** Comparison between RzmA and HolA Cs domains

**Supplementary Fig. 5.** Substrate selection of the RzmA-Cs mutants

**Supplementary Fig. 6.** Crystal structures of RzmA-Cs mutants in complex with the CoA substrate

**Supplementary Fig. 7.** Crystal structure of RzmA-Cs mutant H140V/R148A in complex with two substrates

**Supplementary Fig. 8.** A picture showing two types of RzmA-Cs H140V/R148A crystals growing in the same drop

**Supplementary Fig. 9.** Structure comparison of RzmA-Cs mutant H140V/R148A in different forms

**Supplementary Fig. 10.** The *in vitro* biochemical experiments of dissected RzmA-Cs to simulate *in vivo* conditions

**Supplementary Fig. 11.**  $^1\text{H}$  NMR spectrum of **2a** in  $\text{DMSO-}d_6$

**Supplementary Fig. 12.**  $^{13}\text{C}$  NMR spectrum of **2a** in  $\text{DMSO-}d_6$

**Supplementary Fig. 13.**  $^1\text{H-}^1\text{H}$  COSY spectrum of **2a** in  $\text{DMSO-}d_6$

**Supplementary Fig. 14.** HMBC spectrum of **2a** in  $\text{DMSO-}d_6$

**Supplementary Fig. 15.** HSQC spectrum of **2a** in  $\text{DMSO-}d_6$

**Supplementary Fig. 16.**  $^1\text{H}$  NMR spectrum of **1d** in  $\text{DMSO-}d_6$

**Supplementary Fig. 17.**  $^{13}\text{C}$  NMR spectrum of **1d** in  $\text{DMSO-}d_6$

**Supplementary Fig. 18.**  $^1\text{H-}^1\text{H}$  COSY spectrum of **1d** in  $\text{DMSO-}d_6$

**Supplementary Fig. 19.** HMBC spectrum of **1d** in  $\text{DMSO-}d_6$

**Supplementary Fig. 20.** HSQC spectrum of **1d** in  $\text{DMSO-}d_6$

**Supplementary Fig. 21.**  $^1\text{H}$  NMR spectrum of **1e** in  $\text{DMSO-}d_6$

**Supplementary Fig. 22.**  $^{13}\text{C}$  NMR spectrum of **1e** in  $\text{DMSO-}d_6$

**Supplementary Fig. 23.**  $^1\text{H}$  NMR spectrum of **1f** in  $\text{DMSO-}d_6$

**Supplementary Fig. 24.**  $^{13}\text{C}$  NMR spectrum of **1f** in  $\text{DMSO-}d_6$

**Supplementary Fig. 25.**  $^1\text{H}$  NMR spectrum of **1g** in  $\text{DMSO-}d_6$

**Supplementary Fig. 26.**  $^{13}\text{C}$  NMR spectrum of **1g** in  $\text{DMSO-}d_6$

**Supplementary Fig. 27.**  $^1\text{H}$  NMR spectrum of **1h** in  $\text{DMSO-}d_6$

**Supplementary Fig. 28.**  $^{13}\text{C}$  NMR spectrum of **1h** in  $\text{DMSO-}d_6$

**Supplementary Fig. 29.**  $^1\text{H}$  NMR spectrum of **7b** in  $\text{DMSO-}d_6$

**Supplementary Fig. 30.**  $^{13}\text{C}$  NMR spectrum of **7b** in  $\text{DMSO-}d_6$

**Supplementary Fig. 31.**  $^1\text{H}$  NMR spectrum of **7c** in  $\text{DMSO-}d_6$   
**Supplementary Fig. 32.**  $^{13}\text{C}$  NMR spectrum of **7c** in  $\text{DMSO-}d_6$

## Supplementary Tables

**Supplementary Table 1.** The  $^1\text{H}$  (600 MHz) Data of **1d**, **1e**, **1f**, **1g** and **1h** in  $\text{DMSO}-d_6$

|      | No. | <b>1d</b> (C8-RzmA)     | <b>1e</b> (C10-RzmA)         | <b>1f</b> (C12-RzmA)         | <b>1g</b> (C14-RzmA)         | <b>1h</b> (C16-RzmA)         |
|------|-----|-------------------------|------------------------------|------------------------------|------------------------------|------------------------------|
| FA   | 2a  | 2.14, m                 | 2.12, m                      | 2.12, m                      | 2.12, m                      | 2.12, m                      |
|      | 2b  | 2.11, m                 |                              |                              |                              |                              |
|      | 3   | 1.48, m                 | 1.48, m                      | 1.48, m                      | 1.48, m                      | 1.48, m                      |
|      | 4   | 1.21, m                 | 1.21, m <sup>a</sup>         | 1.21, m <sup>a</sup>         | 1.21, m <sup>a</sup>         | 1.21, m <sup>a</sup>         |
|      | 5   | 1.21, m                 | 1.21, m <sup>a</sup>         | 1.21, m <sup>a</sup>         | 1.21, m <sup>a</sup>         | 1.21, m <sup>a</sup>         |
|      | 6   | 1.21, m                 | 1.21, m <sup>a</sup>         | 1.21, m <sup>a</sup>         | 1.21, m <sup>a</sup>         | 1.21, m <sup>a</sup>         |
|      | 7   | 1.21, m                 | 1.21, m <sup>a</sup>         | 1.21, m <sup>a</sup>         | 1.21, m <sup>a</sup>         | 1.21, m <sup>a</sup>         |
|      | 8   | 0.84, t (7.0)           | 1.21, m <sup>a</sup>         | 1.21, m <sup>a</sup>         | 1.21, m <sup>a</sup>         | 1.21, m <sup>a</sup>         |
|      | 9   |                         | 1.21, m <sup>a</sup>         | 1.21, m <sup>a</sup>         | 1.21, m <sup>a</sup>         | 1.21, m <sup>a</sup>         |
|      | 10  |                         | 0.84, t (7.1)                | 1.21, m <sup>a</sup>         | 1.21, m <sup>a</sup>         | 1.21, m <sup>a</sup>         |
|      | 11  |                         |                              | 1.21, m <sup>a</sup>         | 1.21, m <sup>a</sup>         | 1.21, m <sup>a</sup>         |
|      | 12  |                         |                              | 0.85, t (6.9)                | 1.21, m <sup>a</sup>         | 1.21, m <sup>a</sup>         |
|      | 13  |                         |                              |                              | 1.21, m <sup>a</sup>         | 1.21, m <sup>a</sup>         |
|      | 14  |                         |                              |                              | 0.85, t (6.9)                | 1.21, m <sup>a</sup>         |
|      | 15  |                         |                              |                              |                              | 1.21, m <sup>a</sup>         |
|      | 16  |                         |                              |                              |                              | 0.85, t (6.9)                |
| Leu  | 2   | 4.50, m                 | 4.49, m                      | 4.50, m                      | 4.50, m                      | 4.50, m                      |
|      | 3a  | 1.58, m <sup>a</sup>    | 1.58, m <sup>a</sup>         | 1.59, m <sup>a</sup>         | 1.59, m <sup>a</sup>         | 1.59, m <sup>a</sup>         |
|      | 3b  | 1.42, m                 | 1.42, m                      | 1.42, m                      | 1.43, m                      | 1.42, m                      |
|      | 4   | 1.58, m <sup>a</sup>    | 1.58, m <sup>a</sup>         | 1.59, m <sup>a</sup>         | 1.59, m <sup>a</sup>         | 1.59, m <sup>a</sup>         |
|      | 5   | 0.90, d (6.5)           | 0.90, d (6.4)                | 0.90, d (6.4)                | 0.90, d (6.4)                | 0.90, d (6.4)                |
|      | 6   | 0.81, d (6.5)           | 0.81, d (6.4)                | 0.81, d (6.4)                | 0.81, d (6.5)                | 0.81, d (6.5)                |
|      | NH  | 8.33, d (8.0)           | 8.29, d (8.2)                | 8.30, d (8.0)                | 8.30, d (8.2)                | 8.30, d (8.2)                |
| Thr  | 2   | 4.46, dd<br>(2.3, 9.1)  | 4.46, dd<br>(2.2, 9.0)       | 4.46, dd<br>(1.8, 9.0)       | 4.46, dd<br>(2.2, 9.0)       | 4.46, dd<br>(2.1, 9.0)       |
|      | 3   | 5.20, m                 | 5.21, dq<br>(2.2, 6.4)       | 5.22, dq<br>(1.8, 6.5)       | 5.22, dq<br>(2.2, 6.5)       | 5.22, dq<br>(2.2, 6.5)       |
|      | 4   | 1.00, d (6.4)           | 1.00, d (6.5)                | 1.00, d (6.5)                | 1.00, d (6.5)                | 1.00, d (6.5)                |
|      | NH  | 7.86, d (8.8)           | 7.77, d (9.0)                | 7.77, d (9.0)                | 7.77, d (9.0)                | 7.77, d (9.0)                |
| Tyr  | 2   | 4.37, m                 | 4.38, ddd (5.1,<br>8.9,13.3) | 4.38, ddd (4.9,<br>8.9,13.4) | 4.38, ddd (5.0,<br>8.8,13.4) | 4.38, ddd (5.0,<br>8.9,13.4) |
|      | 3a  | 2.98, dd<br>(4.9, 14.4) | 2.98, dd<br>(5.1, 14.4)      | 2.98, dd<br>(4.9, 14.4)      | 2.98, dd<br>(4.9, 14.4)      | 2.98, dd<br>(4.9, 14.3)      |
|      | 3b  | 2.83, dd<br>(9.0, 14.4) | 2.83, dd<br>(8.9, 14.4)      | 2.83, dd<br>(8.9, 14.4)      | 2.83, dd<br>(8.8, 14.4)      | 2.83, dd<br>(8.9, 14.3)      |
|      | 5/9 | 7.02, d (8.4)           | 7.02, d (8.5)                | 7.02, d (8.4)                | 7.02, d (8.5)                | 7.02, d (8.5)                |
|      | 6/8 | 6.63, d (8.4)           | 6.63, d (8.5)                | 6.63, d (8.5)                | 6.63, d (8.5)                | 6.63, d (8.5)                |
|      | NH  | 7.46, d (7.2)           | 7.35, d (7.4)                | 7.36, d (6.9)                | 7.36, d (7.7)                | 7.36, d (7.8)                |
|      | OH  | 9.27, s                 | 9.20, brs                    | 9.19, brs                    | 9.19, brs                    | 9.19, s                      |
|      |     |                         |                              |                              |                              |                              |
| Ala1 | 2   | 4.04, m                 | 4.04, dq<br>(5.0, 7.0)       | 4.04, dq<br>(4.3, 7.0)       | 4.04, dq<br>(5.8, 7.0)       | 4.04, dq<br>(4.2, 7.0)       |
|      | 3   | 1.29, d (6.9)           | 1.29, d (7.0)                | 1.30, d (7.0)                | 1.30, d (7.0)                | 1.30, d (7.0)                |
|      | NH  | 8.15, d (4.7)           | 8.11, d <sup>a</sup> (5.0)   | 8.10, d <sup>a</sup> (4.3)   | 8.10, d <sup>a</sup> (5.8)   | 8.10, d <sup>a</sup> (4.2)   |
| Ala2 | 2   | 4.28, m                 | 4.28, dq<br>(7.0, 7.1)       | 4.29, dq<br>(7.0, 7.1)       | 4.29, dq<br>(7.0, 7.1)       | 4.29, dq<br>(7.0, 7.1)       |
|      | 3   | 1.22, d (7.3)           | 1.22, d (7.0)                | 1.22, d (7.0)                | 1.22, d (7.0)                | 1.22, d (7.0)                |
|      | NH  | 8.64, d (7.0)           | 8.63, d (7.1)                | 8.64, d (7.1)                | 8.64, d (7.1)                | 8.64, d (7.1)                |
| Ala3 | 2   | 4.20, m                 | 4.19, dq<br>(6.2, 8.2)       | 4.20, dq<br>(4.3, 7.4)       | 4.20, dq<br>(5.8, 7.4)       | 4.20, dq<br>(4.2, 7.4)       |
|      | 3   | 1.23, d (7.1)           | 1.21, d (6.2)                | 1.21, d (7.4)                | 1.21, d (7.4)                | 1.21, d (7.4)                |
|      | NH  | 8.13, d (7.7)           | 8.10, d (8.2)                | 8.10, d <sup>a</sup> (4.3)   | 8.10, d <sup>a</sup> (5.8)   | 8.10, d <sup>a</sup> (4.2)   |
| Val  | 2   | 4.13, dd<br>(7.6, 8.8)  | 4.14, dd<br>(7.6, 8.9)       | 4.14, dd<br>(7.2, 8.8)       | 4.14, dd<br>(7.6, 8.9)       | 4.14, dd<br>(7.7, 8.9)       |
|      | 3   | 1.83, m                 | 1.82, m                      | 1.82, m                      | 1.82, m                      | 1.82, m                      |
|      | 4   | 0.78, d (6.7)           | 0.78, d (6.8)                | 0.78, d (6.7)                | 0.78, d (6.7)                | 0.78, d (6.7)                |
|      | 5   | 0.72, d (6.7)           | 0.71, d (6.7)                | 0.71, d (6.8)                | 0.71, d (6.7)                | 0.71, d (6.7)                |
|      | NH  | 7.34, d (8.9)           | 7.32, d (8.9)                | 7.31, d (8.8)                | 7.31, d (9.0)                | 7.31, d (9.0)                |
|      |     |                         |                              |                              |                              |                              |

**Supplementary Table 2.** The  $^{13}\text{C}$  NMR (150 MHz) Data of **1d**, **1e**, **1f**, **1g** and **1h** in DMSO- $d_6$ 

|      | No. | <b>1d</b>             | <b>1e</b>             | <b>1f</b>             | <b>1g</b>             | <b>1h</b>             |
|------|-----|-----------------------|-----------------------|-----------------------|-----------------------|-----------------------|
| FA   | 1   | 172.9, C              | 173.0, C              | 173.0, C              | 173.0, C              | 173.0, C              |
|      | 2   | 35.1, CH <sub>2</sub> | 35.1, CH <sub>2</sub> | 35.1, CH <sub>2</sub> | 35.1, CH <sub>2</sub> | 35.1, CH <sub>2</sub> |
|      | 3   | 25.4, CH <sub>2</sub> | 25.4, CH <sub>2</sub> | 25.4, CH <sub>2</sub> | 25.4, CH <sub>2</sub> | 25.3, CH <sub>2</sub> |
|      | 4   | 28.4, CH <sub>2</sub> | 28.5, CH <sub>2</sub> | 28.5, CH <sub>2</sub> | 28.5, CH <sub>2</sub> | 28.5, CH <sub>2</sub> |
|      | 5   | 28.4, CH <sub>2</sub> | 28.6, CH <sub>2</sub> | 28.7, CH <sub>2</sub> | 28.7, CH <sub>2</sub> | 28.7, CH <sub>2</sub> |
|      | 6   | 31.2, CH <sub>2</sub> | 28.9, CH <sub>2</sub> | 29.0, CH <sub>2</sub> | 29.0, CH <sub>2</sub> | 28.9, CH <sub>2</sub> |
|      | 7   | 22.0, CH <sub>2</sub> | 28.7, CH <sub>2</sub> | 29.0, CH <sub>2</sub> | 29.0, CH <sub>2</sub> | 29.0, CH <sub>2</sub> |
|      | 8   | 14.0, CH <sub>3</sub> | 31.3, CH <sub>2</sub> | 29.0, CH <sub>2</sub> | 29.0, CH <sub>2</sub> | 29.0, CH <sub>2</sub> |
|      | 9   |                       | 22.1, CH <sub>2</sub> | 28.7, CH <sub>2</sub> | 29.0, CH <sub>2</sub> | 29.0, CH <sub>2</sub> |
|      | 10  |                       | 14.0, CH <sub>3</sub> | 31.3, CH <sub>2</sub> | 29.0, CH <sub>2</sub> | 29.0, CH <sub>2</sub> |
|      | 11  |                       |                       | 22.1, CH <sub>2</sub> | 28.7, CH <sub>2</sub> | 29.0, CH <sub>2</sub> |
|      | 12  |                       |                       | 14.0, CH <sub>3</sub> | 31.3, CH <sub>2</sub> | 29.0, CH <sub>2</sub> |
|      | 13  |                       |                       |                       | 22.1, CH <sub>2</sub> | 28.7, CH <sub>2</sub> |
|      | 14  |                       |                       |                       | 14.0, CH <sub>3</sub> | 31.3, CH <sub>2</sub> |
|      | 15  |                       |                       |                       |                       | 22.1, CH <sub>2</sub> |
|      | 16  |                       |                       |                       |                       | 14.0, CH <sub>3</sub> |
| Leu  | 1   | 172.7, C              | 172.7, C              | 172.7, C              | 172.7, C              | 172.7, C              |
|      | 2   | 50.7, CH              | 50.7, CH              | 50.7, CH              | 50.7, CH              | 50.7, CH              |
|      | 3   | 39.8, CH <sub>2</sub> | 39.2, CH <sub>2</sub> | 39.2, CH <sub>2</sub> | 39.2, CH <sub>2</sub> | 39.2, CH <sub>2</sub> |
|      | 4   | 24.0, CH              | 24.0, CH              | 24.0, CH              | 24.0, CH              | 24.0, CH              |
|      | 5   | 23.2, CH <sub>3</sub> | 23.2, CH <sub>3</sub> | 23.2, CH <sub>3</sub> | 23.2, CH <sub>3</sub> | 23.2, CH <sub>3</sub> |
|      | 6   | 21.0, CH <sub>3</sub> | 21.0, CH <sub>3</sub> | 21.0, CH <sub>3</sub> | 21.0, CH <sub>3</sub> | 21.0, CH <sub>3</sub> |
| Thr  | 1   | 168.2, C              | 168.2, C              | 168.2, C              | 168.2, C              | 168.2, C              |
|      | 2   | 55.2, CH              | 55.1, CH              | 55.2, CH              | 55.2, CH              | 55.2, CH              |
|      | 3   | 70.0, CH              | 70.1, CH              | 70.1, CH              | 70.1, CH              | 70.1, CH              |
|      | 4   | 15.5, CH <sub>3</sub> | 15.5, CH <sub>3</sub> | 15.5, CH <sub>3</sub> | 15.5, CH <sub>3</sub> | 15.5, CH <sub>3</sub> |
| Tyr  | 1   | 170.9, C              | 170.9, C              | 170.9, C              | 170.9, C              | 170.9, C              |
|      | 2   | 54.8, CH              | 54.7, CH              | 54.8, CH              | 54.8, CH              | 54.8, CH              |
|      | 3   | 36.0, CH <sub>2</sub> | 36.0, CH <sub>2</sub> | 36.0, CH <sub>2</sub> | 36.0, CH <sub>2</sub> | 36.0, CH <sub>2</sub> |
|      | 4   | 127.1, C              | 127.1, C              | 127.1, C              | 127.1, C              | 127.1, C              |
|      | 5/9 | 130.0, CH             | 130.0, CH             | 130.0, CH             | 130.0, CH             | 130.0, CH             |
|      | 6/8 | 115.0, CH             | 115.0, CH             | 115.0, CH             | 115.0, CH             | 115.0, CH             |
|      | 7   | 160.0, C              | 155.9, C              | 155.9, C              | 155.9, C              | 155.9, C              |
| Ala1 | 1   | 172.7, C              | 172.7, C              | 172.7, C              | 172.7, C              | 172.7, C              |
|      | 2   | 48.9, CH              | 48.9, CH              | 48.9, CH              | 48.9, CH              | 48.9, CH              |
|      | 3   | 17.2, CH <sub>3</sub> | 17.2, CH <sub>3</sub> | 17.2, CH <sub>3</sub> | 17.2, CH <sub>3</sub> | 17.2, CH <sub>3</sub> |
| Ala2 | 1   | 171.8, C              | 171.8, C              | 171.8, C              | 171.8, C              | 171.8, C              |
|      | 2   | 48.8, CH              | 48.8, CH              | 48.8, CH              | 48.8, CH              | 48.8, CH              |
|      | 3   | 16.3, CH <sub>3</sub> | 16.3, CH <sub>3</sub> | 16.3, CH <sub>3</sub> | 16.3, CH <sub>3</sub> | 16.3, CH <sub>3</sub> |
| Ala3 | 1   | 171.7, C              | 171.7, C              | 171.7, C              | 171.7, C              | 171.7, C              |
|      | 2   | 49.4, CH              | 49.4, CH              | 49.4, CH              | 49.4, CH              | 49.4, CH              |
|      | 3   | 17.5, CH <sub>3</sub> | 17.5, CH <sub>3</sub> | 17.5, CH <sub>3</sub> | 17.5, CH <sub>3</sub> | 17.5, CH <sub>3</sub> |
| Val  | 1   | 169.4, C              | 169.3, C              | 169.3, C              | 169.3, C              | 169.3, C              |
|      | 2   | 57.7, CH              | 57.6, CH              | 57.6, CH              | 57.6, CH              | 57.6, CH              |
|      | 3   | 30.3, CH              | 30.3, CH              | 30.3, CH              | 30.3, CH              | 30.3, CH              |
|      | 4   | 18.9, CH <sub>3</sub> | 18.8, CH <sub>3</sub> | 18.8, CH <sub>3</sub> | 18.8, CH <sub>3</sub> | 18.8, CH <sub>3</sub> |
|      | 5   | 18.0, CH <sub>3</sub> | 18.0, CH <sub>3</sub> | 18.0, CH <sub>3</sub> | 18.0, CH <sub>3</sub> | 18.0, CH <sub>3</sub> |

**Supplementary Table 3.** The  $^1\text{H}$  (600 MHz) and  $^{13}\text{C}$  NMR (150 MHz) Data of **2a** in  $\text{DMSO-}d_6$ 

|        | No.    | $\delta_{\text{C}}$ | $\delta_{\text{H}}$ | Mult. ( $J$ in Hz) |
|--------|--------|---------------------|---------------------|--------------------|
| HAc    | 1      | 169.3, C            |                     |                    |
|        | 2      | 22.4, $\text{CH}_3$ | 1.84                | s                  |
| Val    | 1      | 170.8, C            |                     |                    |
|        | 2      | 57.9, CH            | 4.06                | dd (7.3, 8.3)      |
|        | 3      | 30.0 CH             | 1.86                | m                  |
|        | 4      | 19.1, $\text{CH}_3$ | 0.73                | d (7.3)            |
|        | 5      | 18.0, $\text{CH}_3$ | 0.74                | d (7.3)            |
|        | 2-NH   |                     | 7.79                | d (8.3)            |
| Phe    | 1      | 170.9, C            |                     |                    |
|        | 2      | 53.5, CH            | 4.55                | m                  |
|        | 3a     | 37.2, $\text{CH}_2$ | 3.05                | dd (4.2, 14.2)     |
|        | 3b     |                     | 2.79                | dd (10.2, 14.2)    |
|        | 4      | 137.7, C            |                     |                    |
|        | 5/9    | 129.1, CH           | 7.23                | $m^a$              |
|        | 6/8    | 127.9, CH           | 7.23                | $m^a$              |
|        | 7      | 126.1, CH           | 7.17                | t (6.7)            |
| 2-NH   |        | 7.95                | d (8.0)             |                    |
| Glu    | 1      | 171.2, C            |                     |                    |
|        | 2      | 51.5, CH            | 4.17                | m                  |
|        | 3a     | 27.3, $\text{CH}_2$ | 1.95                | m                  |
|        | 3b     |                     | 1.78                | $m^a$              |
|        | 4a     | 31.5, $\text{CH}_2$ | 2.25                | m                  |
|        | 4b     |                     | 2.18                | m                  |
|        | 5      | 172.9, C            |                     |                    |
|        | 2-NH   |                     | 8.10                | d (7.8)            |
| 5-COOH |        | 12.60               | brs                 |                    |
| Ile1   | 1      | 170.7, C            |                     |                    |
|        | 2      | 56.6, CH            | 4.20                | m                  |
|        | 3      | 36.6, CH            | 1.68                | m                  |
|        | 4a     | 24.2, $\text{CH}_2$ | 1.39                | $m^a$              |
|        | 4b     |                     | 1.07                | m                  |
|        | 5      | 10.9, $\text{CH}_3$ | 0.77                | t (7.3)            |
|        | 6      | 15.2, $\text{CH}_3$ | 0.84                | d (7.1)            |
| 2-NH   |        | 7.83                | d (9.1)             |                    |
| Ala    | 1      | 171.9, C            |                     |                    |
|        | 2      | 47.9, CH            | 4.36                | m                  |
|        | 3      | 17.9, $\text{CH}_3$ | 1.19                | d (7.0)            |
|        | 2-NH   |                     | 8.08                | d (7.3)            |
| Ile2   | 1      | 172.6, C            |                     |                    |
|        | 2      | 56.1, CH            | 4.16                | m                  |
|        | 3      | 36.4, CH            | 1.78                | $m^a$              |
|        | 4      | 24.5, $\text{CH}_2$ | 1.39                | $m^a$              |
|        | 4b     |                     | 1.18                | $m^a$              |
|        | 5      | 11.1, $\text{CH}_3$ | 0.82                | t (6.6)            |
|        | 6      | 15.3, $\text{CH}_3$ | 0.84                | d (7.1)            |
|        | 2-NH   |                     | 7.81                | d (8.3)            |
|        | 1-COOH |                     | 12.60               | brs                |

<sup>a</sup> overlapped

**Supplementary Table 4.** The  $^1\text{H}$  (500 MHz) and  $^{13}\text{C}$  NMR (125 MHz) Data of **7b,7c** in  $\text{DMSO-}d_6$ 

| Position | <b>7b</b>             |                                       | <b>7c</b>             |                                       |
|----------|-----------------------|---------------------------------------|-----------------------|---------------------------------------|
|          | $\delta_{\text{C}}$   | $\delta_{\text{H}}$ ( <i>J</i> in Hz) | $\delta_{\text{C}}$   | $\delta_{\text{H}}$ ( <i>J</i> in Hz) |
| 1        | 167.7, C              |                                       | 167.6, C              |                                       |
| 2        | 123.3, CH             | 6.19, d (15.8)                        | 123.3, CH             | 6.18, d (15.9)                        |
| 3        | 143.1, CH             | 6.40, dd (4.3, 15.8)                  | 143.0, CH             | 6.40, dd (4.3, 15.9)                  |
| 4        | 44.8, CH              | 4.38, m                               | 44.7, CH              | 4.38, m                               |
| 5        | 18.5, CH <sub>3</sub> | 1.24, d <sup>a</sup>                  | 18.5, CH <sub>3</sub> | 1.24, d <sup>a</sup>                  |
| 6        | 171.1, C              |                                       | 171.1, C              |                                       |
| 7        | 51.2, CH              | 4.34, m                               | 51.2, CH              | 4.33, m                               |
| 8a       | 42.4, CH <sub>2</sub> | 1.83, m                               | 42.4, CH <sub>2</sub> | 1.83, m                               |
| 8b       |                       | 1.58, m                               |                       | 1.58, m                               |
| 9        | 66.9, CH              | 3.57, m                               | 67.0, CH              | 3.57, m                               |
| 10a      | 39.2, CH <sub>2</sub> | 1.48, m <sup>a</sup>                  | 39.2, CH <sub>2</sub> | 1.47, m <sup>a</sup>                  |
| 10b      |                       | 1.37, m                               |                       | 1.37, m                               |
| 11a      | 39.9, CH <sub>2</sub> | 3.03, m                               | 39.9, CH <sub>2</sub> | 3.02, m                               |
| 11b      |                       | 2.98, m                               |                       | 2.98, m                               |
| 12       | 169.5, C              |                                       | 169.5, C              |                                       |
| 13       | 57.9, CH              | 4.18, dd (3.7, 8.6)                   | 57.9, CH              | 4.18, dd (3.7, 8.6)                   |
| 14       | 66.6, CH              | 3.94, m                               | 66.6, CH              | 3.93, m                               |
| 15       | 19.9, CH <sub>3</sub> | 0.99, d (6.2)                         | 19.9, CH <sub>3</sub> | 0.99, d (6.2)                         |
| 16       | 172.6, C              |                                       | 172.5, C              |                                       |
| 17       | 35.3, CH <sub>2</sub> | 2.16, m                               | 35.3, CH <sub>2</sub> | 2.16, m                               |
| 18       | 25.4, CH <sub>2</sub> | 1.48, m <sup>a</sup>                  | 25.4, CH <sub>2</sub> | 1.47, m <sup>a</sup>                  |
| 19       | 28.5, CH <sub>2</sub> | 1.24, m <sup>a</sup>                  | 28.6, CH <sub>2</sub> | 1.24, m <sup>a</sup>                  |
| 20       | 28.6, CH <sub>2</sub> | 1.24, m <sup>a</sup>                  | 28.7, CH <sub>2</sub> | 1.24, m <sup>a</sup>                  |
| 21       | 31.2, CH <sub>2</sub> | 1.24, m <sup>a</sup>                  | 28.9, CH <sub>2</sub> | 1.24, m <sup>a</sup>                  |
| 22       | 22.1, CH <sub>2</sub> | 1.24, m <sup>a</sup>                  | 28.8, CH <sub>2</sub> | 1.24, m <sup>a</sup>                  |
| 23       | 14.0, CH <sub>3</sub> | 0.86, t (6.7)                         | 31.3, CH <sub>2</sub> | 1.24, m <sup>a</sup>                  |
| 24       |                       |                                       | 22.1, CH <sub>2</sub> | 1.24, m <sup>a</sup>                  |
| 25       |                       |                                       | 14.0, CH <sub>3</sub> | 0.85, t (6.5)                         |
| 4-NH     |                       | 8.64, brs                             |                       | 8.67, brs                             |
| 7-NH     |                       | 7.64, brs                             |                       | 7.65, d (7.6)                         |
| 9-OH     |                       | 4.67, brs                             |                       | 4.74, brs                             |
| 11-NH    |                       | 7.40, t (5.8)                         |                       | 7.42, t (6.1)                         |
| 13-NH    |                       | 7.69, d (8.5)                         |                       | 7.69, d (8.8)                         |
| 14-OH    |                       | 4.81, brs                             |                       | 4.74, brs                             |

<sup>a</sup> Overlapped

**Supplementary Table 5. Data collection and refinement statistics**

|                                                      | RzmA-Cs WT               | R148A                  | R148A+C8-CoA          | H140V/R148A           | H140V/R148A<br>+C8-CoA | H140V/R148A+C8-<br>CoA+Leu-SNAC | H140V/R148A<br>product-released |
|------------------------------------------------------|--------------------------|------------------------|-----------------------|-----------------------|------------------------|---------------------------------|---------------------------------|
| <b>PDB code</b>                                      | 7C1H                     | 7C1K                   | 7C1L                  | 7C1P                  | 7C1R                   | 7C1S                            | 7C1U                            |
| <b>Data collection</b>                               |                          |                        |                       |                       |                        |                                 |                                 |
| Space group                                          | P1                       | P1                     | P212121               | P1                    | P212121                | P212121                         | P212121                         |
| Cell dimensions                                      |                          |                        |                       |                       |                        |                                 |                                 |
| <i>a</i> , <i>b</i> , <i>c</i> (Å)                   | 60.05,88.76,97.88        | 59.97,89.70, 98.35     | 52.91,72.33,108.54    | 60.64,89.65,98.07     | 52.77,72.09,108.28     | 52.83,72.39,108.58              | 52.56,58.78,134.06              |
| $\alpha$ , $\beta$ , $\gamma$ (°)                    | 67.30,89.90,89.92        | 113.22,90.09,89.92     | 90,90,90              | 66.89,90.02,90.25     | 90,90,90               | 90,90,90                        | 90 90 90                        |
| Resolution (Å)                                       | 50-2.30 (2.34-2.3)*      | 50-2.80(2.85-2.80)     | 50-1.85(1.95-1.85)    | 50-2.60(2.64-2.60)    | 50-1.7(1.73-1.70)      | 50-2.6 (2.62-2.58)              | 50-1.40(1.42-1.40)              |
| <i>R</i> <sub>sym</sub> or <i>R</i> <sub>merge</sub> | 3.9 (52.6)               | 6.7 (36.6)             | 6.8 (53.2)            | 4.4 (36.3)            | 5.6 (86.6)             | 15.2 (76.2)                     | 5.6 (89.7)                      |
| <i>I</i> / $\delta I$                                | 34.9 (2.4)               | 16.8 (2.7)             | 17.8 (2.8)            | 28.7 (3.2)            | 46.4 (2.7)             | 16.4 (2.8)                      | 45.1 (2.3)                      |
| Completeness (%)                                     | 94.7 (96.5)              | 94.8(88.7)             | 99.8 (98.7)           | 94.8 (95.5)           | 99.8 (99.0)            | 99.9 (100.0)                    | 97.9(92.9)                      |
| Redundancy                                           | 3.6 (3.6)                | 3.6(3.4)               | 12.1 (9.1)            | 3.6(3.6)              | 12.5 (10.8)            | 12.7 (11.3)                     | 13.1 (11.8)                     |
| <b>Refinement</b>                                    |                          |                        |                       |                       |                        |                                 |                                 |
| Resolution (Å)                                       | 28.79 - 2.30 (2.38-2.30) | 39.12-2.76 (2.85-2.76) | 26.45-1.85(1.91-1.85) | 41.23-2.59(2.68-2.59) | 36.05-1.70(1.76-1.70)  | 30.11-2.59(2.68-2.59)           | 29.46-1.40(1.45-1.40)           |
| No. reflections                                      | 72208 (4537)             | 43482 (2548)           | 35982(3330)           | 54816(4525)           | 44367(3286)            | 13471(1249)                     | 76339 (4500)                    |
| <i>R</i> <sub>work</sub> / <i>R</i> <sub>free</sub>  | 22.3/26.1                | 23.2/26.8              | 19.1/22.9             | 22.5/24.2             | 18.6/22.9              | 19.6/25.3                       | 14.7/17.9                       |
| No. atoms                                            |                          |                        |                       |                       |                        |                                 |                                 |
| Protein                                              | 12713                    | 12742                  | 3396                  | 12722                 | 3373                   | 3387                            | 3426                            |
| Ligand/ion                                           |                          |                        | 65                    |                       | 65                     | 72                              |                                 |
| Water                                                | 625                      | 290                    | 163                   | 322                   | 377                    | 82                              | 469                             |
| <i>B</i> -factors                                    |                          |                        |                       |                       |                        |                                 |                                 |
| Protein                                              | 35.0                     | 40.9                   | 54.8                  | 45.7                  | 25.2                   | 44.2                            | 24.7                            |
| Ligand/ion                                           |                          |                        | 67.3                  |                       | 39.6                   | 67.0                            |                                 |
| Water                                                | 28.9                     | 25.5                   | 44.7                  | 28.5                  | 31.8                   | 37.4                            | 35.0                            |
| R.m.s. deviations                                    |                          |                        |                       |                       |                        |                                 |                                 |
| Bond lengths (Å)                                     | 0.004                    | 0.004                  | 0.007                 | 0.004                 | 0.007                  | 0.002                           | 0.01                            |
| Bond angles (°)                                      | 0.61                     | 0.63                   | 0.89                  | 0.60                  | 0.92                   | 0.52                            | 1.53                            |

One crystal was used for each structure.

\*Values in parentheses are for highest-resolution shell.



## Supplementary Figures

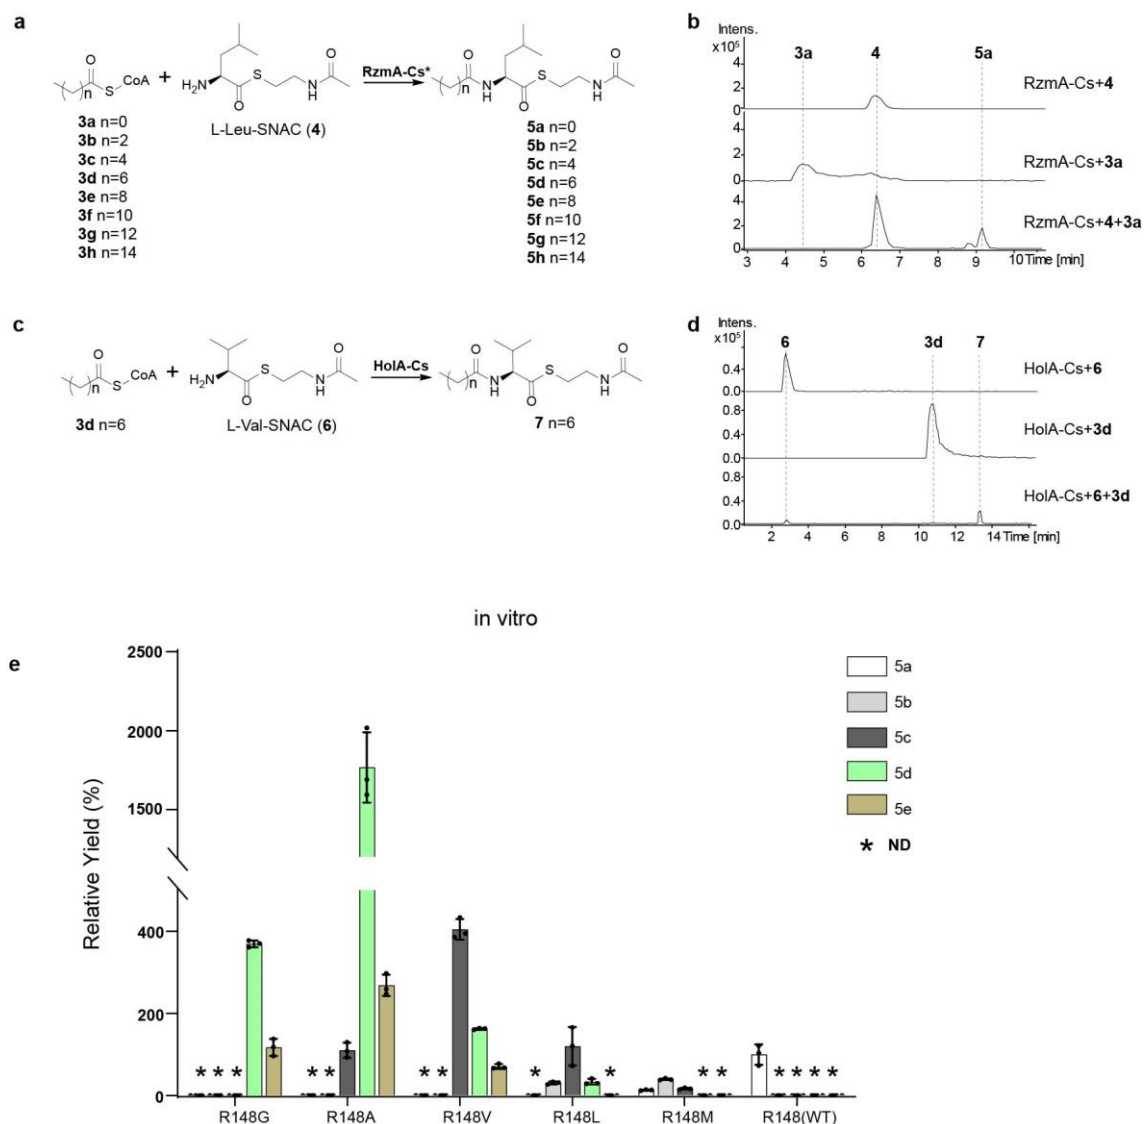

**Supplementary Fig. 1. The *in vitro* biochemical experiments of dissected RzmA-Cs and HolA-Cs domains.** **a**, The RzmA-Cs catalyzes the condensation between C2-CoA (**3a**) and L-Leu-SNAC (**4**). **b**, UPLC-MS analysis of the product (**5a**) in RzmA-Cs catalyzed reaction. Shown are EICs at  $m/z = 233.3$  ( $[M+H]^+$ , **4**), at  $m/z = 810.5$  ( $[M+H]^+$ , **3a**) and at  $m/z = 275.3$  ( $[M+H]^+$ , **5a**). **c**, The HolA-Cs catalyzes the condensation between C8-CoA (**3d**) and L-Val-SNAC (**6**). **d**, UPLC-MS analysis of the product (**7**) in HolA-Cs catalyzed reaction. Shown are EICs at  $m/z = 219.3$  ( $[M+H]^+$ , **6**), at  $m/z = 945.8$  (**3d**, octanoyl-CoA ammonium salt, CAS Number: 799812-82-1), and at  $m/z = 345.5$  ( $[M+H]^+$ , **7**). **e**, *in vitro* test of RzmA-Cs domain variants. The donor substrates contain same concentrations of C2-, C4-, C6-, and C8-CoAs were reacted with mimic substrates of acceptor L-Leu-SNAC for each Cs domain variants. The yield of **5a** in RzmA-Cs WT was quantified as a reference (100%) for the peak areas of EICs. The products that were not detected (ND) by UPLC-MS are marked with asterisks. Three ( $n=3$ ) independent tests and data are presented as mean yield  $\pm$  SD. Source data are provided in the Source Data file.

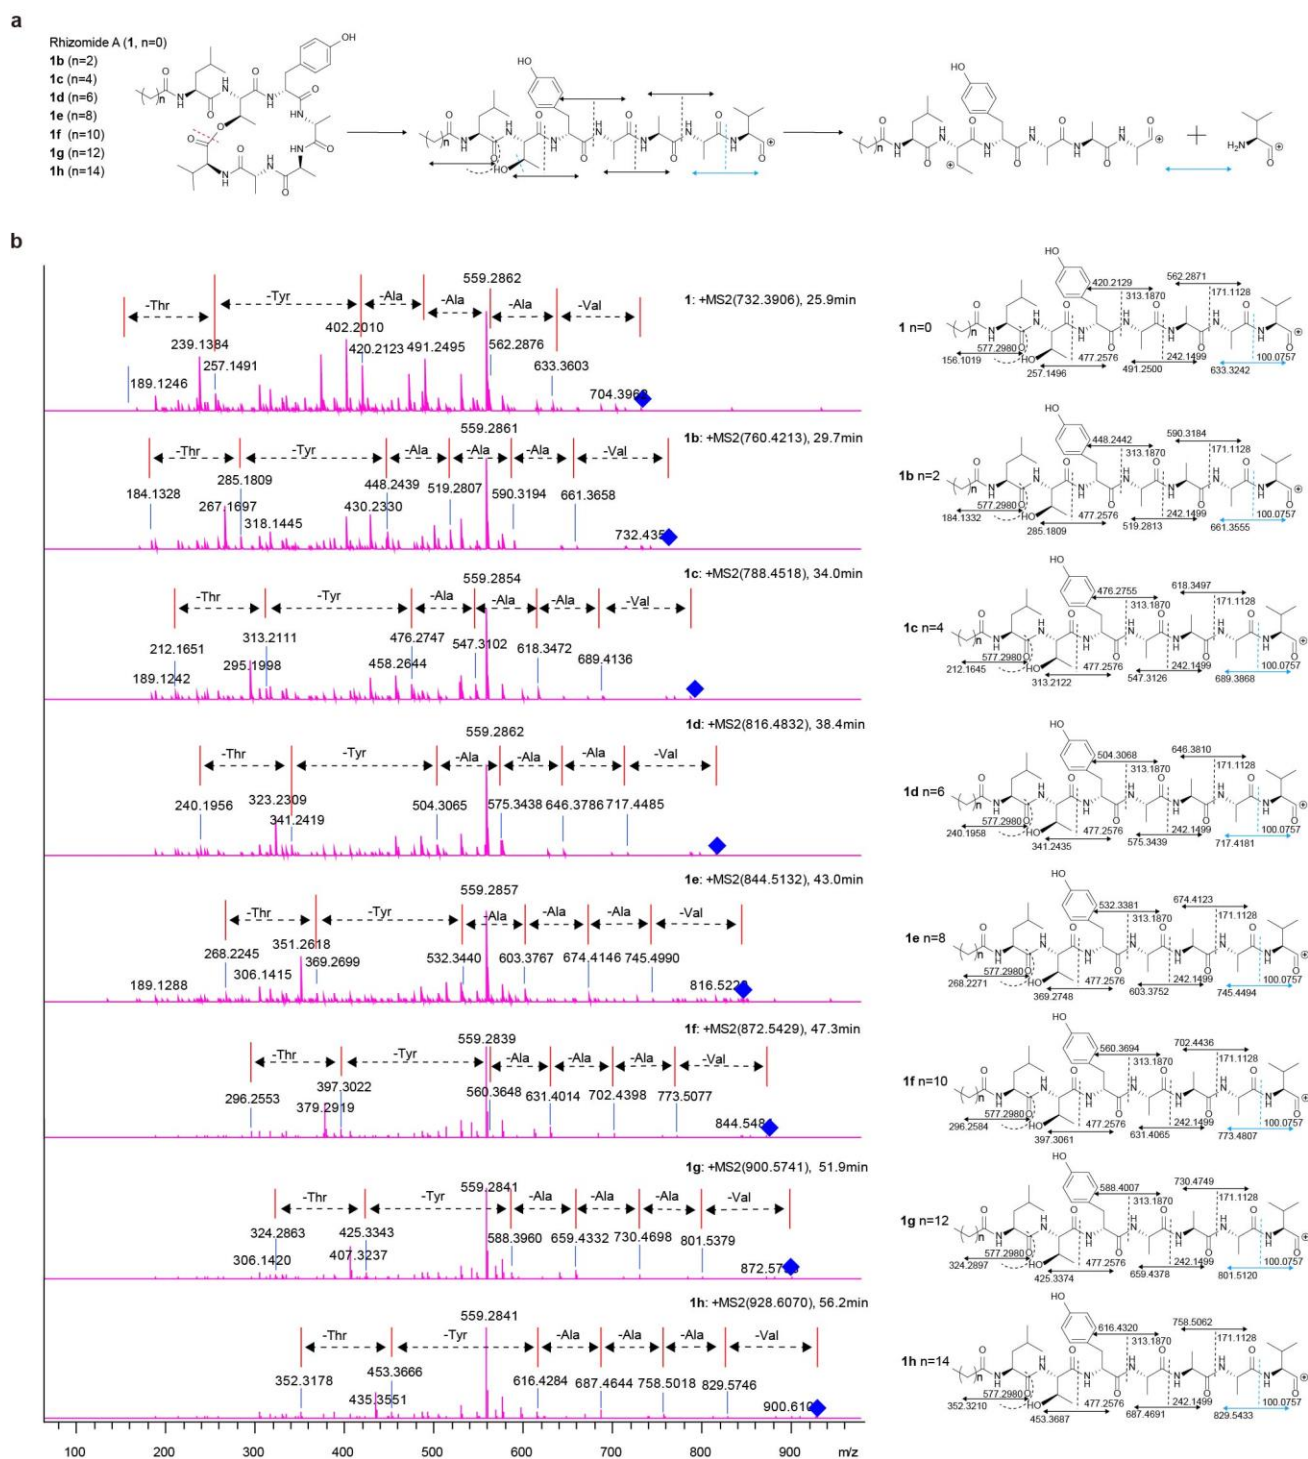

**Supplementary Fig. 2. Structural determination of rhizomide derivatives 1b-1h by MS/MS. a,** Structures and MS/MS fragmentation pattern of rhizomides. **b,** HRMS/MS spectra (left) and theoretical ion peaks of fragments (right) of rhizomide A (**1**) and derivatives **1b-1h**. All MS values in the spectra were given automatically from the Compass DataAnalysis software (Bruker).

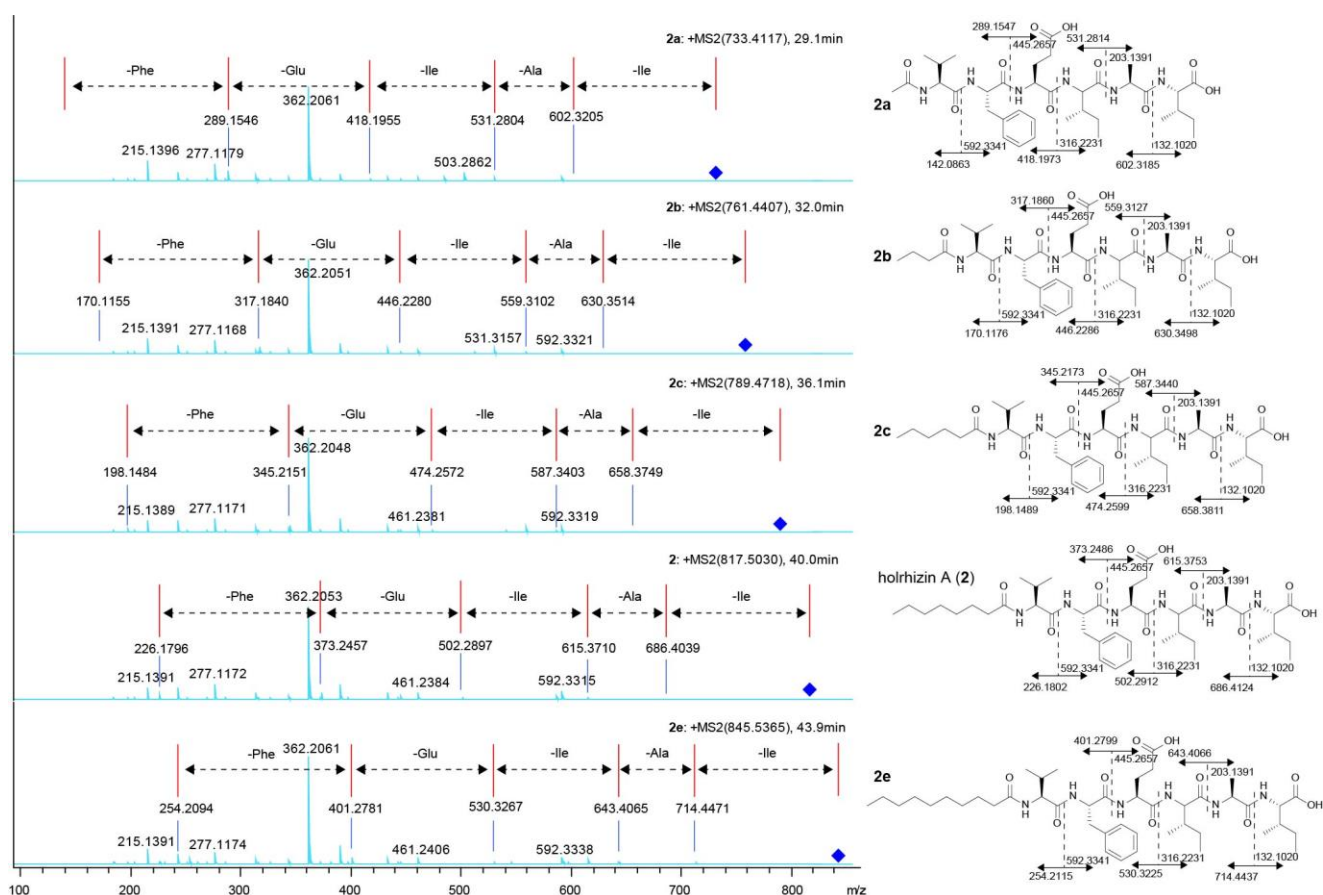

**Supplementary Fig. 3. Structural determination of holrhizin derivatives by MS/MS.** HRMS/MS spectra (left) and theoretical ion peaks of fragments (right) of holrhizin A (**2**) and derivatives **2a-2e**. All MS values in the spectra were given automatically from the Compass DataAnalysis software (Bruker).



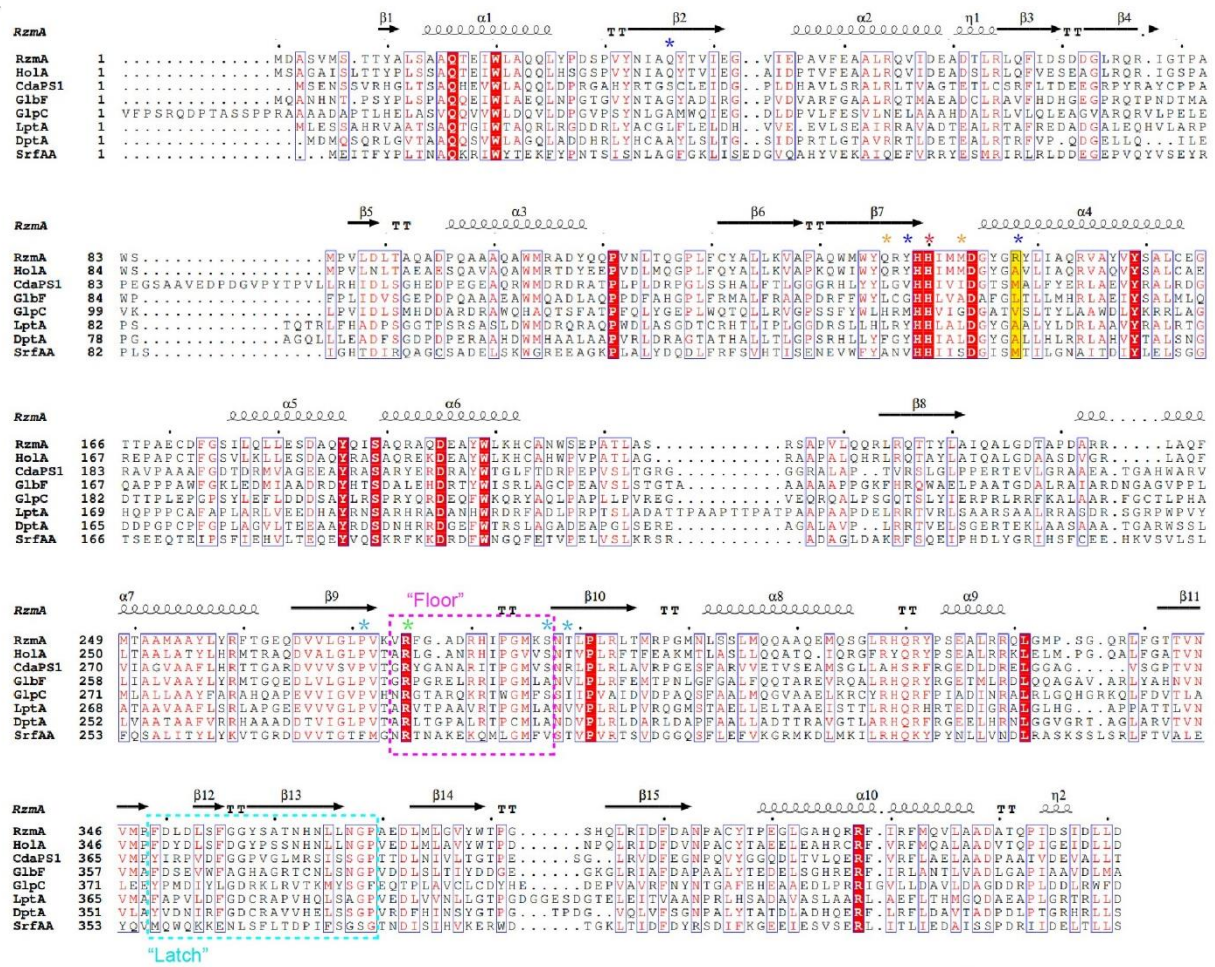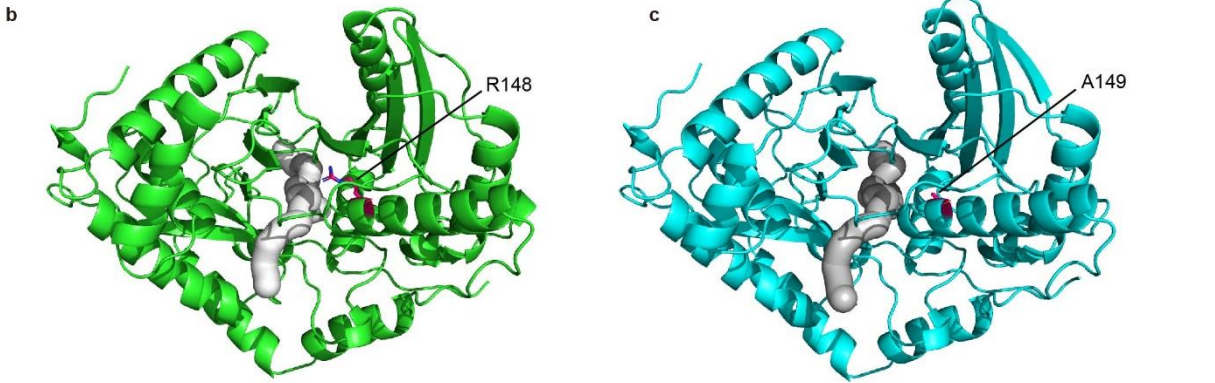

**Supplementary Fig. 4. Comparison between RzmA and HoloA Cs domains.** **a**, Structure-based sequence alignment of RzmA-Cs and HoloA-Cs with other Cs domains (as also shown in Fig. 1d). CdaPS1 (*Streptomyces coelicolor*, PDB code 4JN3), GlbF (*Schlegelella brevitalea*, A8KCJ2), DptA (*Streptomyces filamentosus*, Q50E74), LptA (*Streptomyces fradiae*, Q45R85), SrfAA (*Bacillus subtilis*, P27206). The “floor” and “latch” regions are boxed with magenta and cyan dashed lines, respectively. The blue asterisks (Q36, Y138 and R148 of RzmA) and yellow asterisks (M143 and Q136 of RzmA) represent key and additional sites for specificity of lipid chains, respectively. The active site residue H140 of RzmA is marked as red. Three potential residues (P271, S287 and T289 of RzmA) for specificity of amino acid substrate are labelled in cyan. The green asterisk residue (R275) within the “floor” loop is critical for the conformational stability during substrate binding. **b** and **c**, The predicted structures of RzmA-Cs and HoloA-Cs by homology modeling, with their active-site tunnels and the “gate” residues (R148 and A149) highlighted respectively.

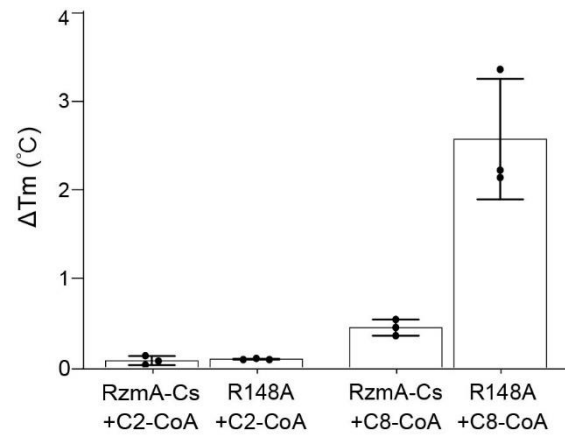

**Supplementary Fig. 5. Substrate selection of the RzmA-Cs mutants.** Binding of RzmA-Cs wild-type and its mutant R148A to the substrates C2-CoA or C8-CoA, as measured by the protein thermal shift assays. Test were conducted in triplicates ( $n=3$ , and mean yield  $\pm$  SD are presented). Source data are provided in the Source Data file.

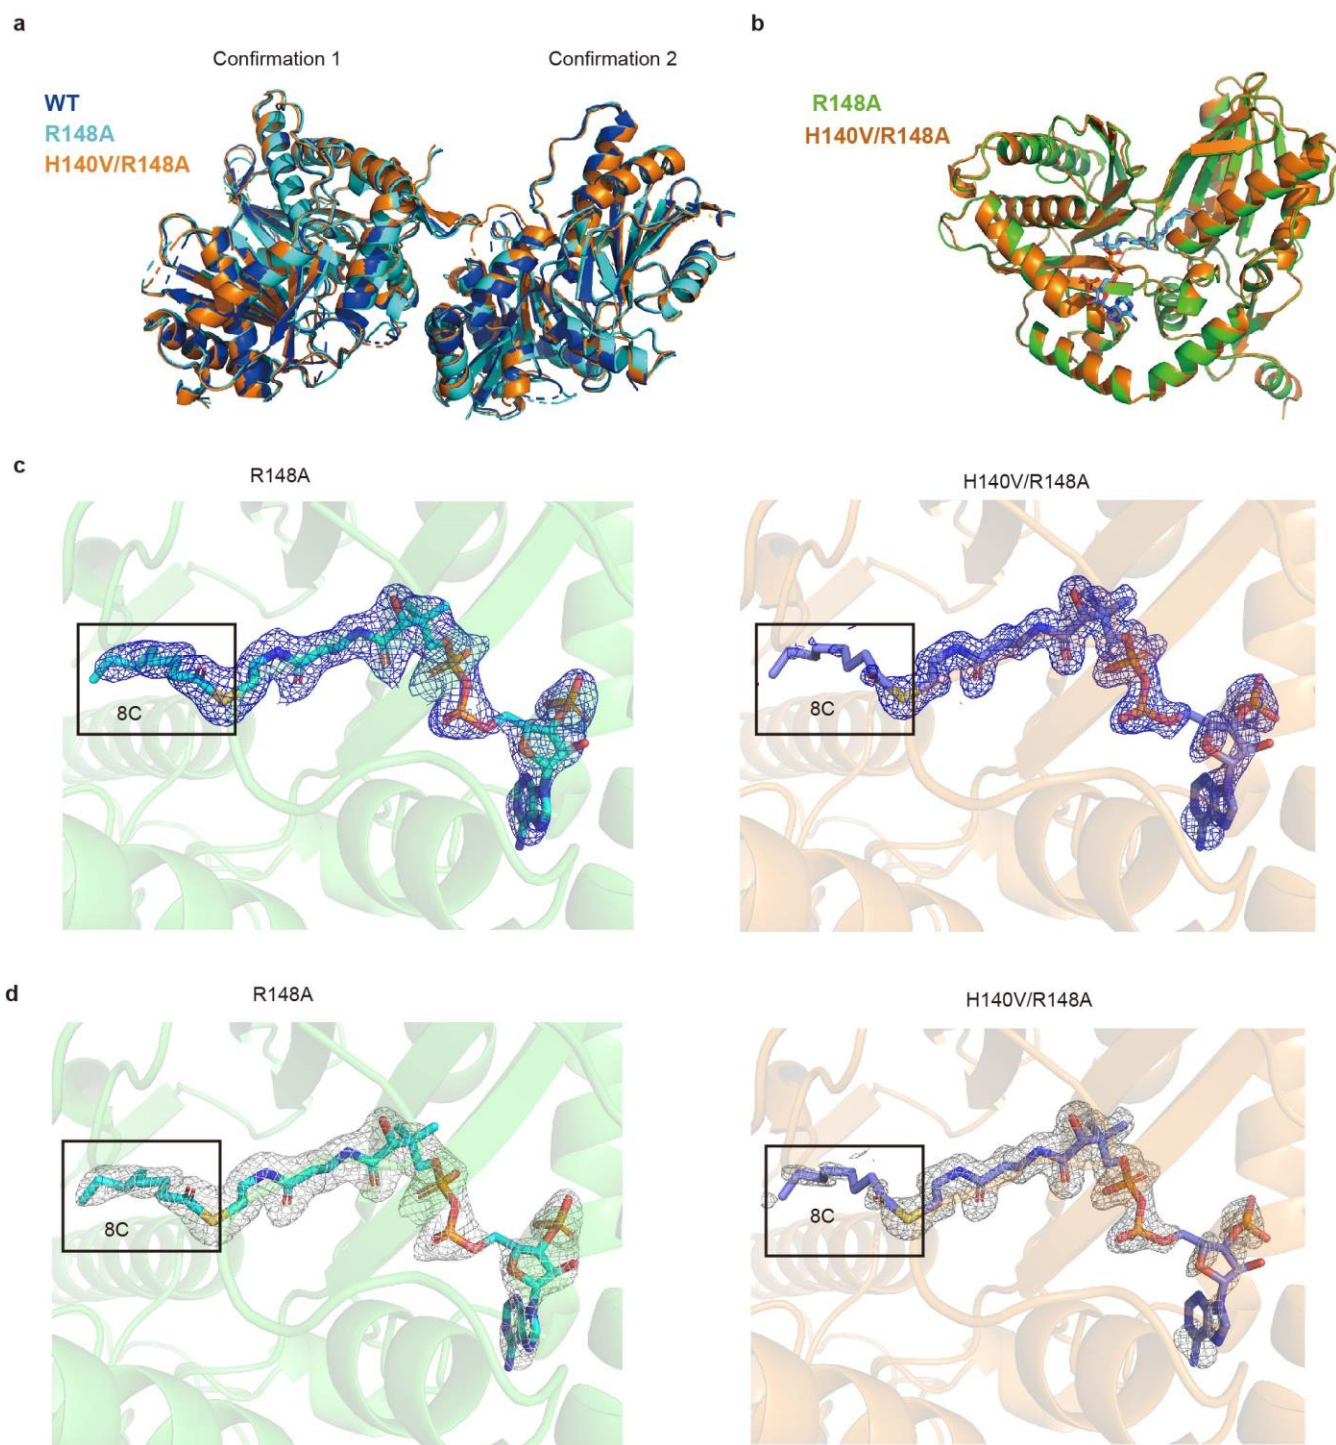

**Supplementary Fig. 6. Crystal structures of RzmA-Cs mutants in complex with the C8-CoA substrate.** **a**, Superimposition of three unbound structures of RzmA-Cs. **b**, Comparison of C8-CoA-bound structures between RzmA-Cs R148A and H140V/R148A. **c**, The 2Fo-Fc density map of C8-CoA in R148A (cyan) and H140V/R148A (purple), with contour level at 1  $\sigma$  and shown as blue mesh. **d**, The Fo-Fc omit map of C8-CoA in R148A (cyan) and H140V/R148A (purple), with contour level at 3.0 and shown as gray mesh.



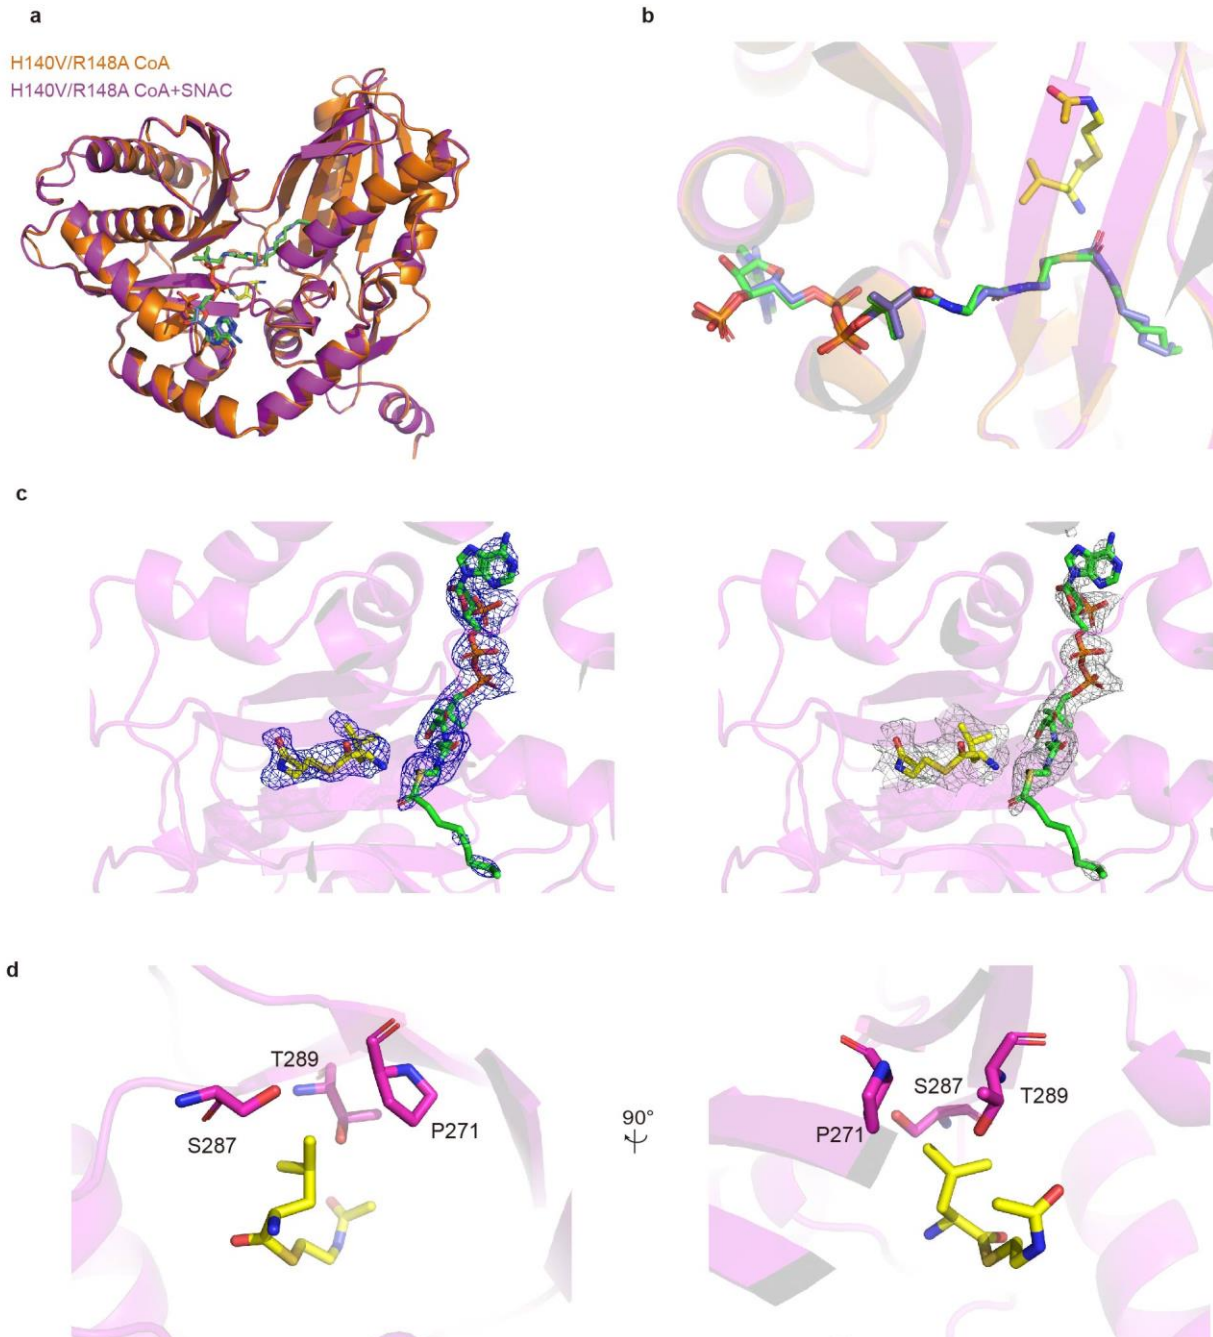

**Supplementary Fig. 7. Crystal structure of RzmA-Cs mutant H140V/R148A in complex with two substrates.** **a**, Superimposition of H140V/R148A structure in co-complex with C8-CoA (green), L-Leu-SNAC (yellow) and that with only C8-CoA (purple). **b**, An enlarged view of the substrate-binding pocket. **c**, The 2Fo-Fc density map of C8-CoA and L-Leu-SNAC (left, contour level = 0.8  $\sigma$ ) and the Fo-Fc omit map of C8-CoA and L-Leu-SNAC (right, contour level = 3.0  $\sigma$ ). **d**, Residues close to the side-chain of substrate L-Leu in RzmA-Cs, shown in two views.

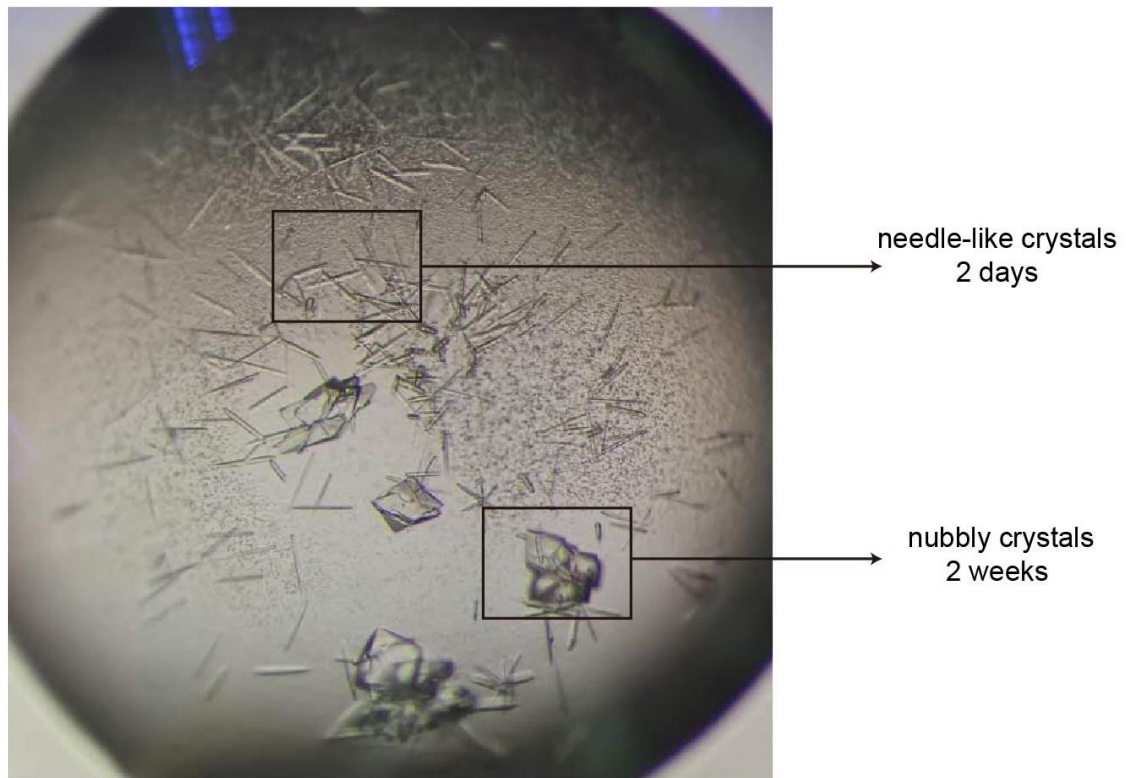

**Supplementary Fig. 8. A picture showing two types of RzmA-Cs H140V/R148A crystals growing in the same drop.** The needle-like crystals were co-complex with two substrates which grew in two days, and the nubbly crystals grew in the same drop after 2 weeks that were ligand-free state we named “released”.



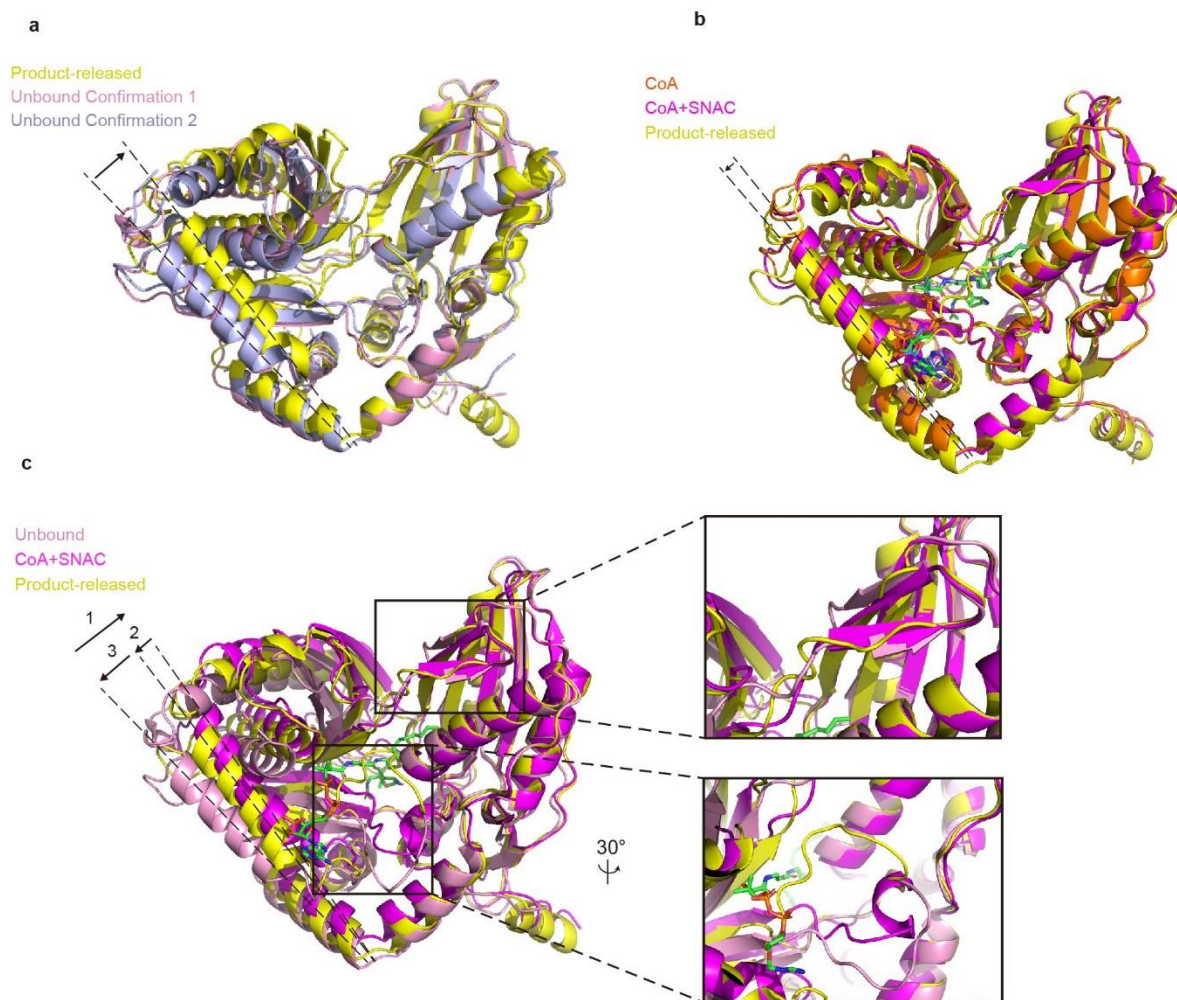

**Supplementary Fig. 9. Structure comparison of RzmA-Cs mutant H140V/R148A in different forms. a,** Superimposition of H140V/R148A “product-released” structure (yellow) with its two other conformations in the “unbound” form. **b,** Superimposition of H140V/R148A “product-released” structure (yellow) with its co-crystal structures in complex with only one (orange) or two (magenta) substrates. **c,** Superimposition of H140V/R148A structures in the proposed “unbound-bound-released” reaction cycle (illustrated as 1, 2 and 3 in the figure), with two enlarged views showing details at the “latch” and “floor” regions.

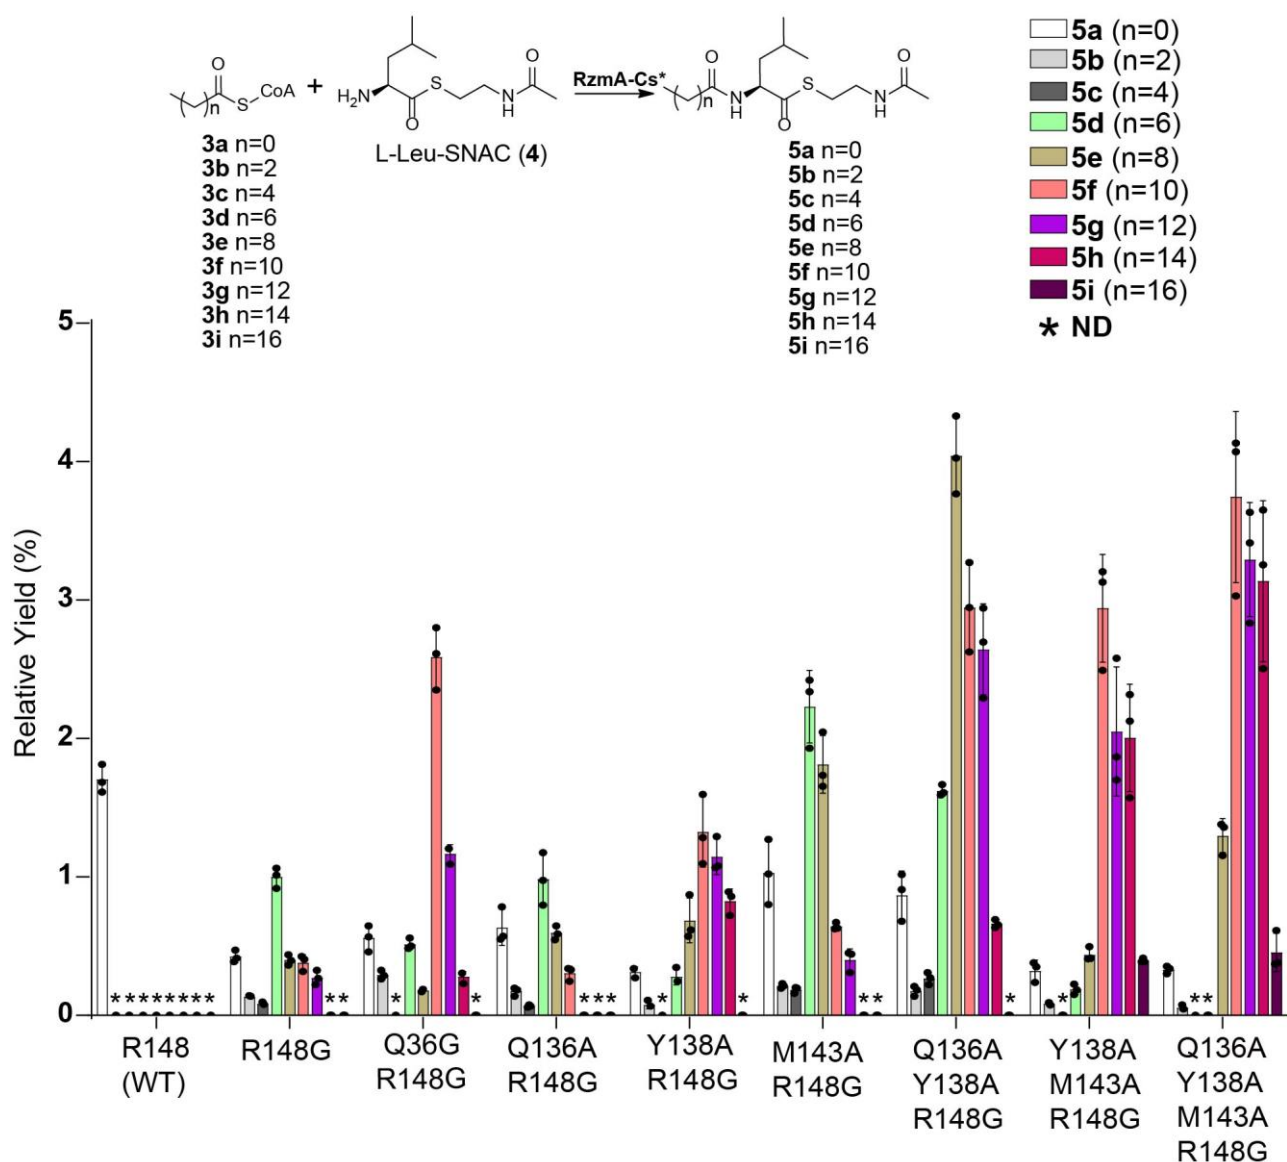

**Supplementary Fig. 10** The *in vitro* biochemical experiments of dissected RzmA-Cs to simulate *in vivo* conditions. The relative concentrations of C2-CoA: C4-CoA: C6-C18 CoA (1000:100:1) and an extended incubation time (6 h) were given to simulate *in vivo* condition as much as possible. The relative yields of acyl-Leu-SNAC (**5a-5i**) in the *in vitro* acyl-CoAs substrate competition experiment of RzmA-Cs variants, and the yield of **5d** (C8-Leu-SNAC) in RzmA-Cs R148G was quantified as a reference (100%) for the peak area of EICs. The products that were not detected (ND) by UPLC-MS are marked with asterisks. Three (n=3) independent experiments, data, and mean yield  $\pm$  SD are presented. Source data are provided as in the Source Data file.

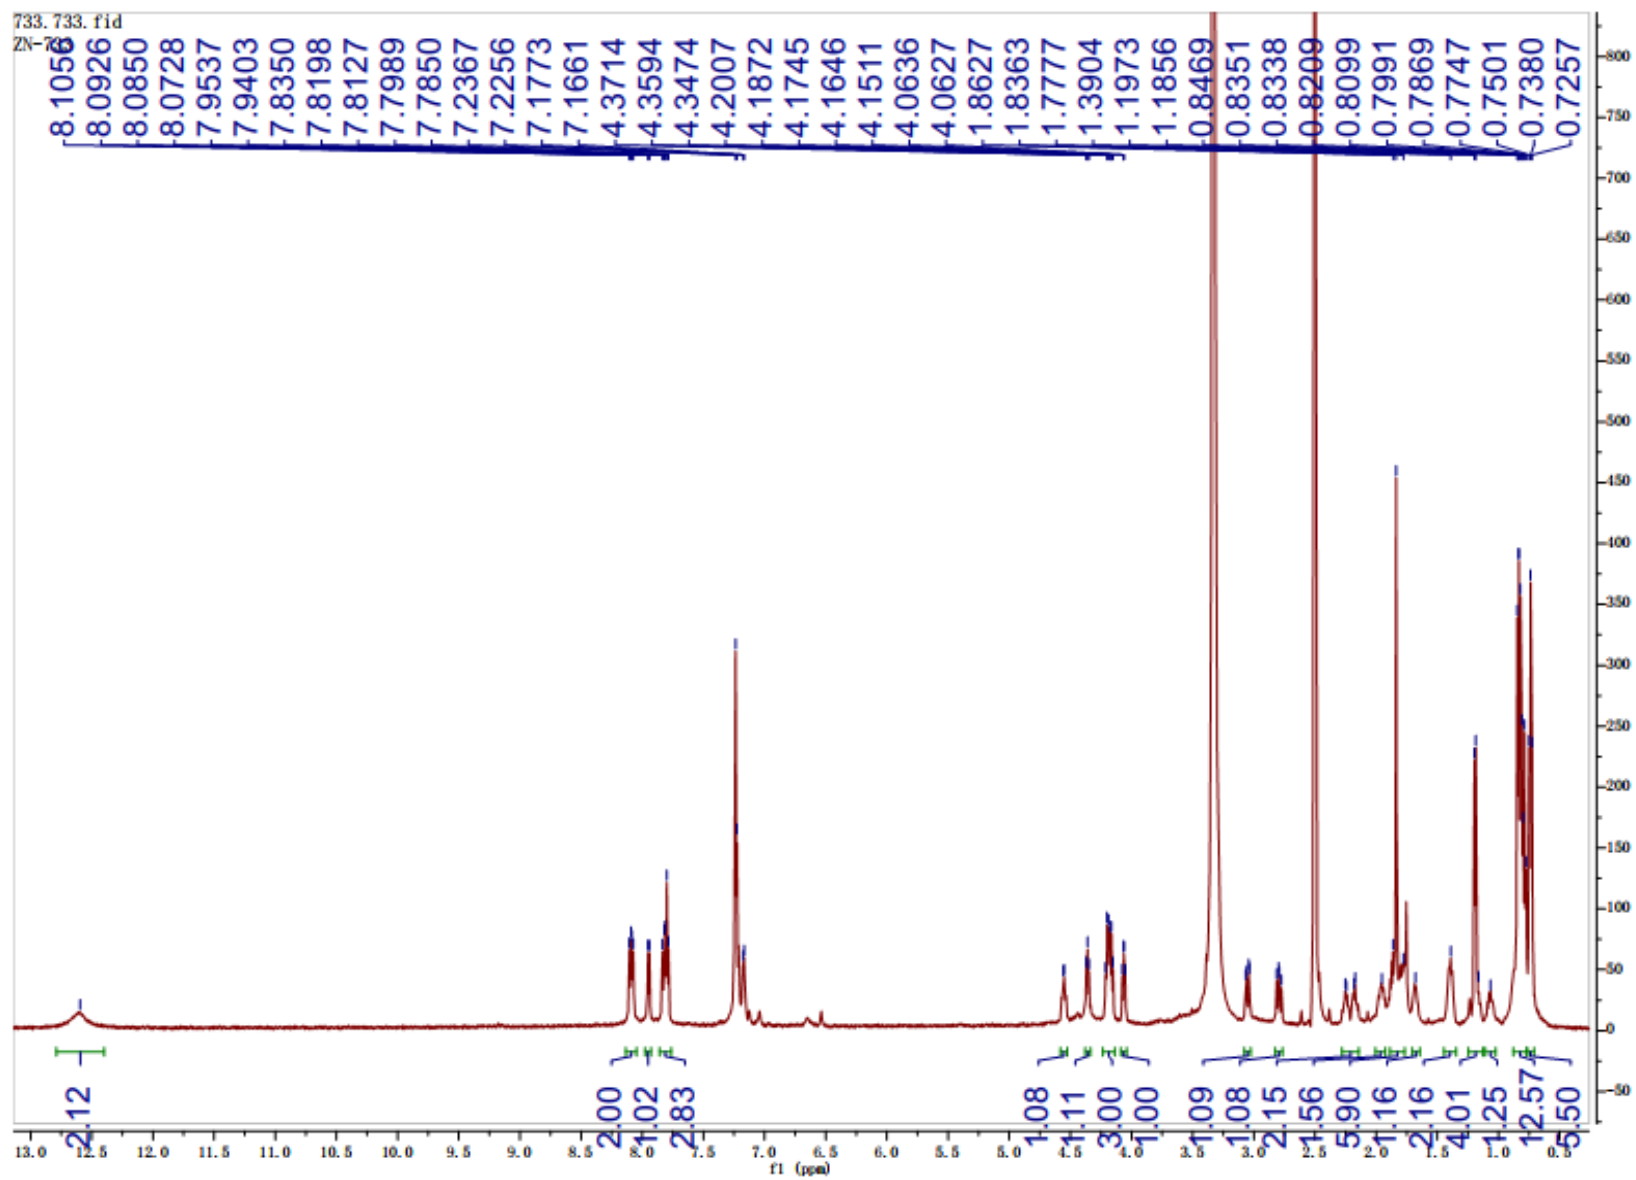

Supplementary Fig. 11.  $^1\text{H}$  NMR spectrum of **2a** in  $\text{DMSO-}d_6$

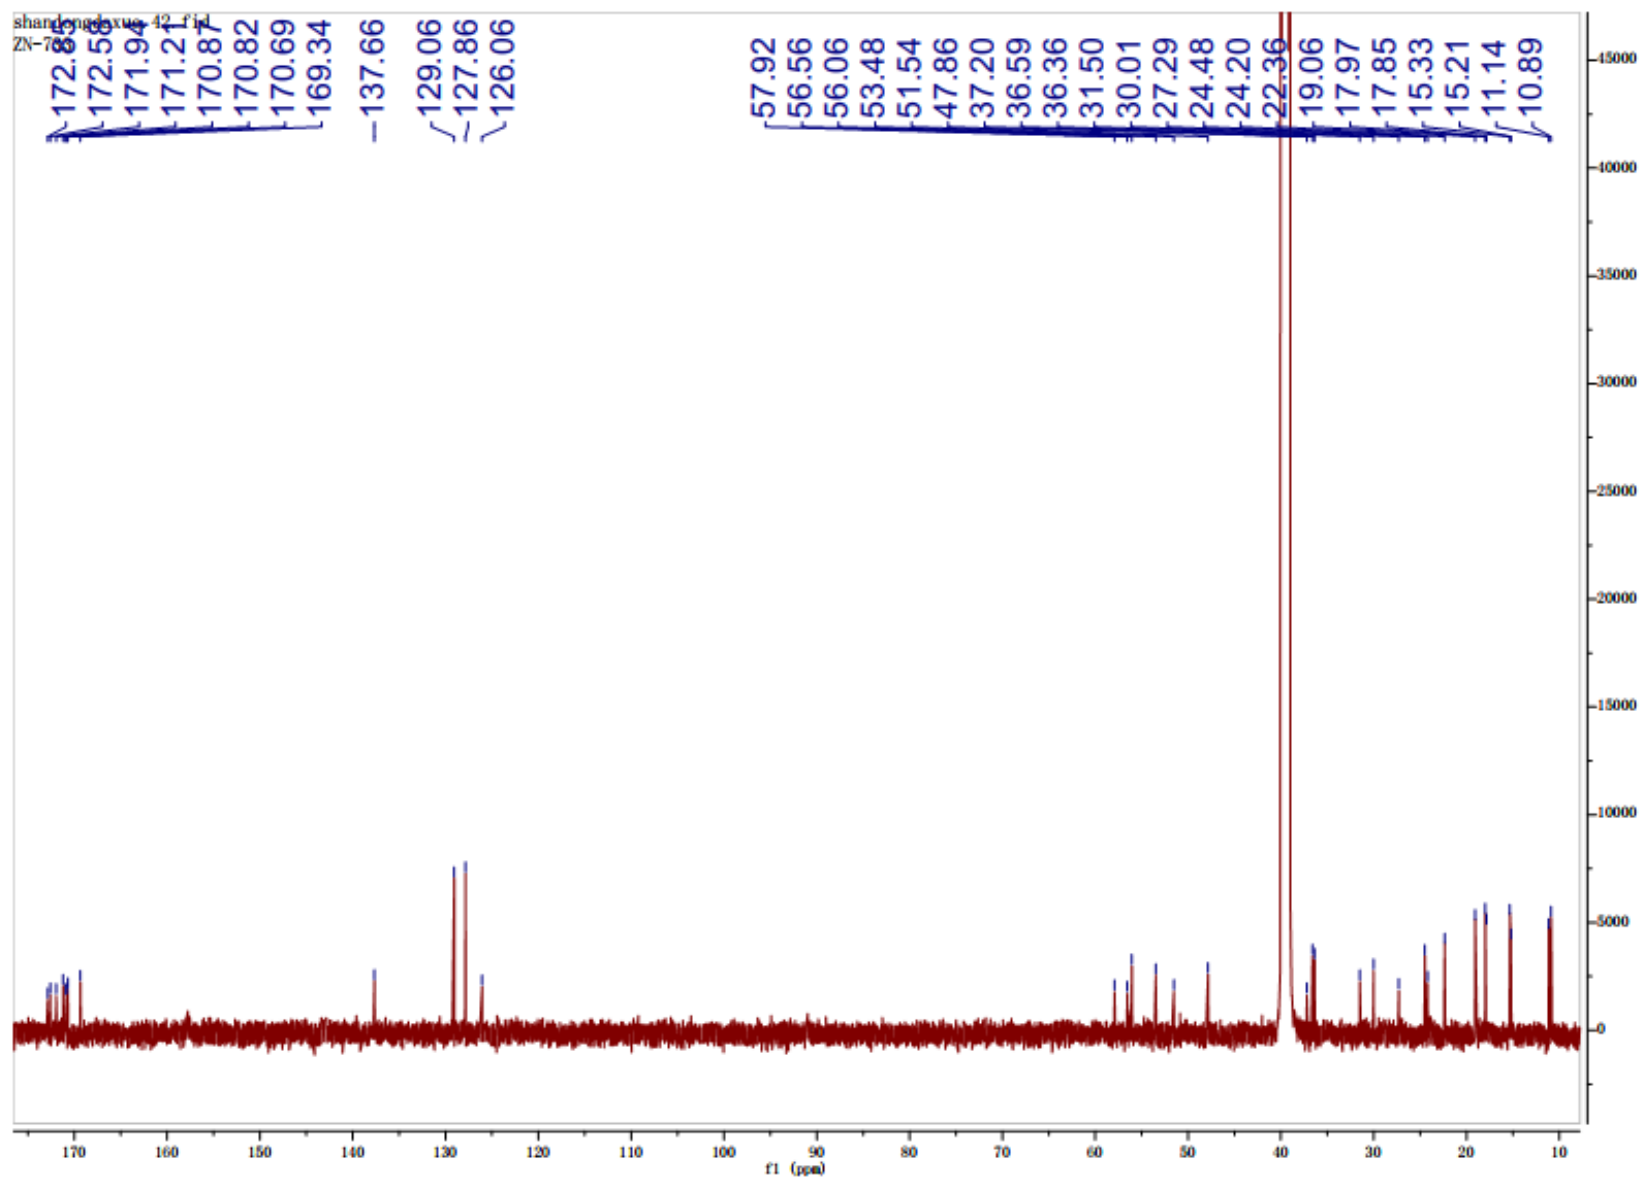

Supplementary Fig. 12.  $^{13}\text{C}$  NMR spectrum of **2a** in  $\text{DMSO-}d_6$

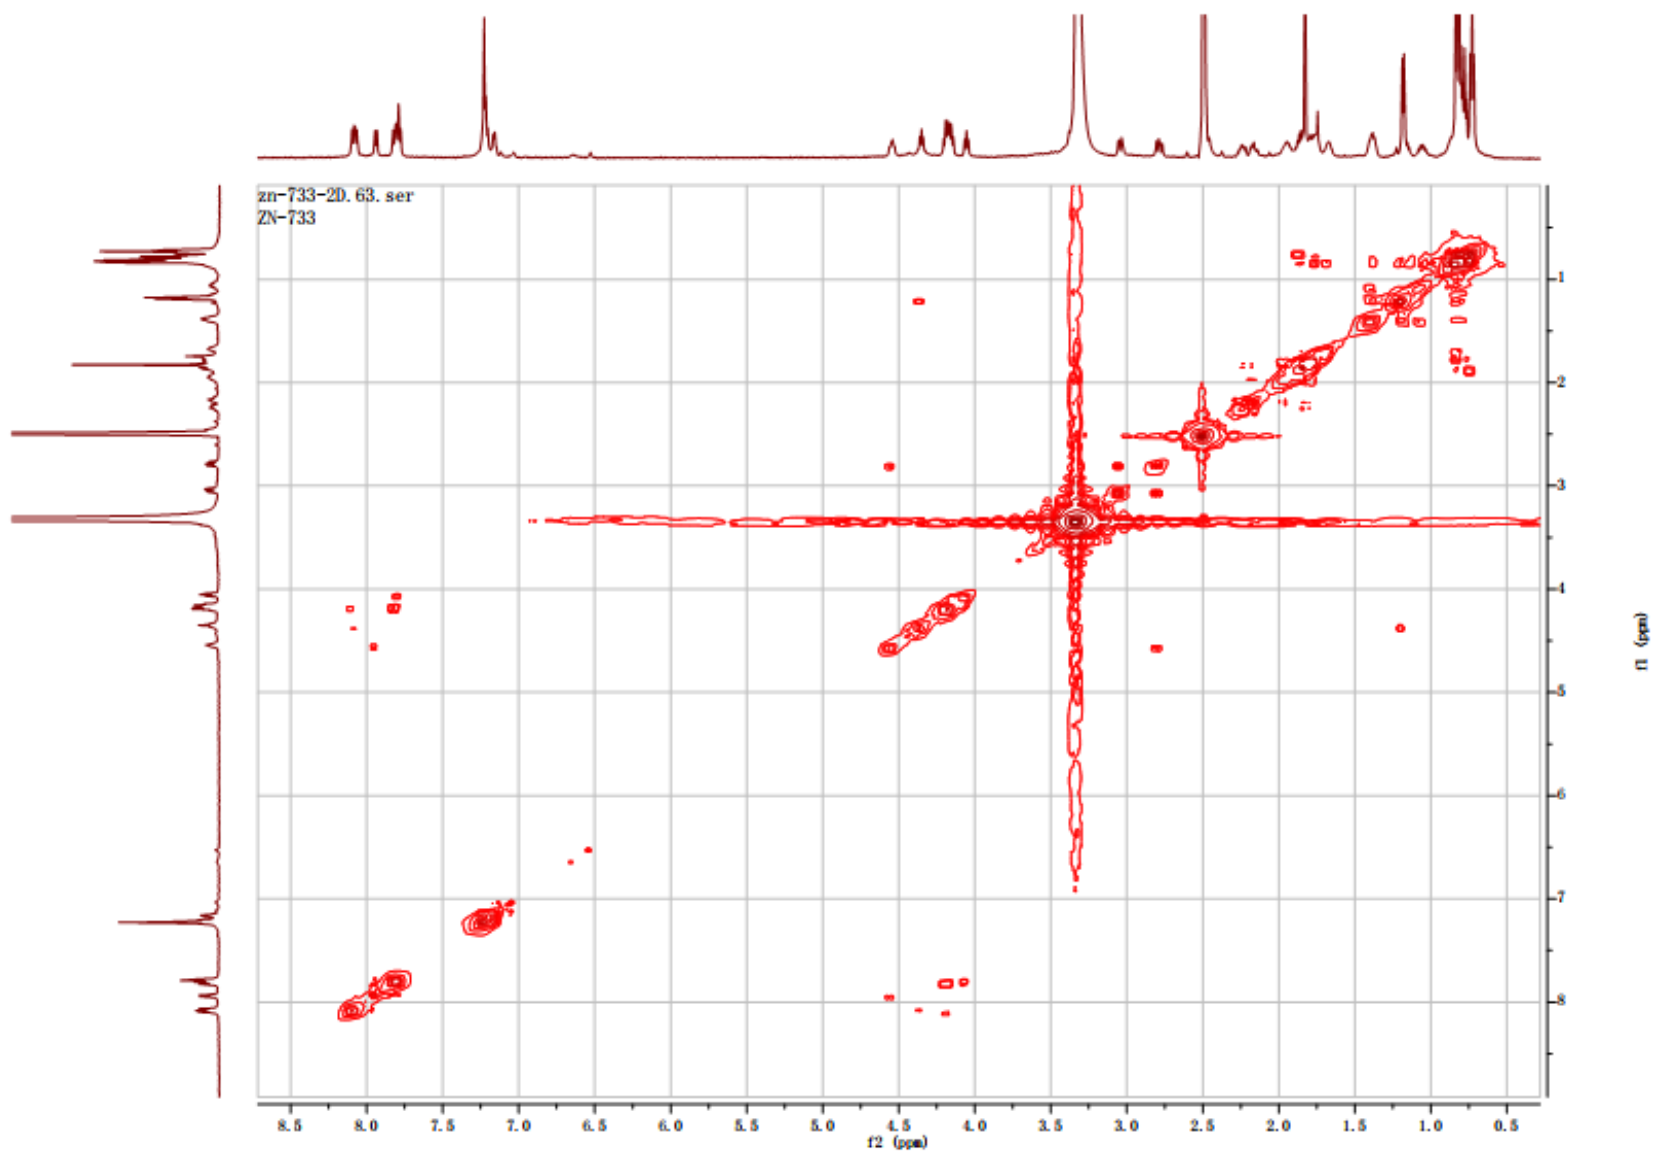

Supplementary Fig. 13.  $^1\text{H}$ - $^1\text{H}$  COSY spectrum of **2a** in  $\text{DMSO-}d_6$

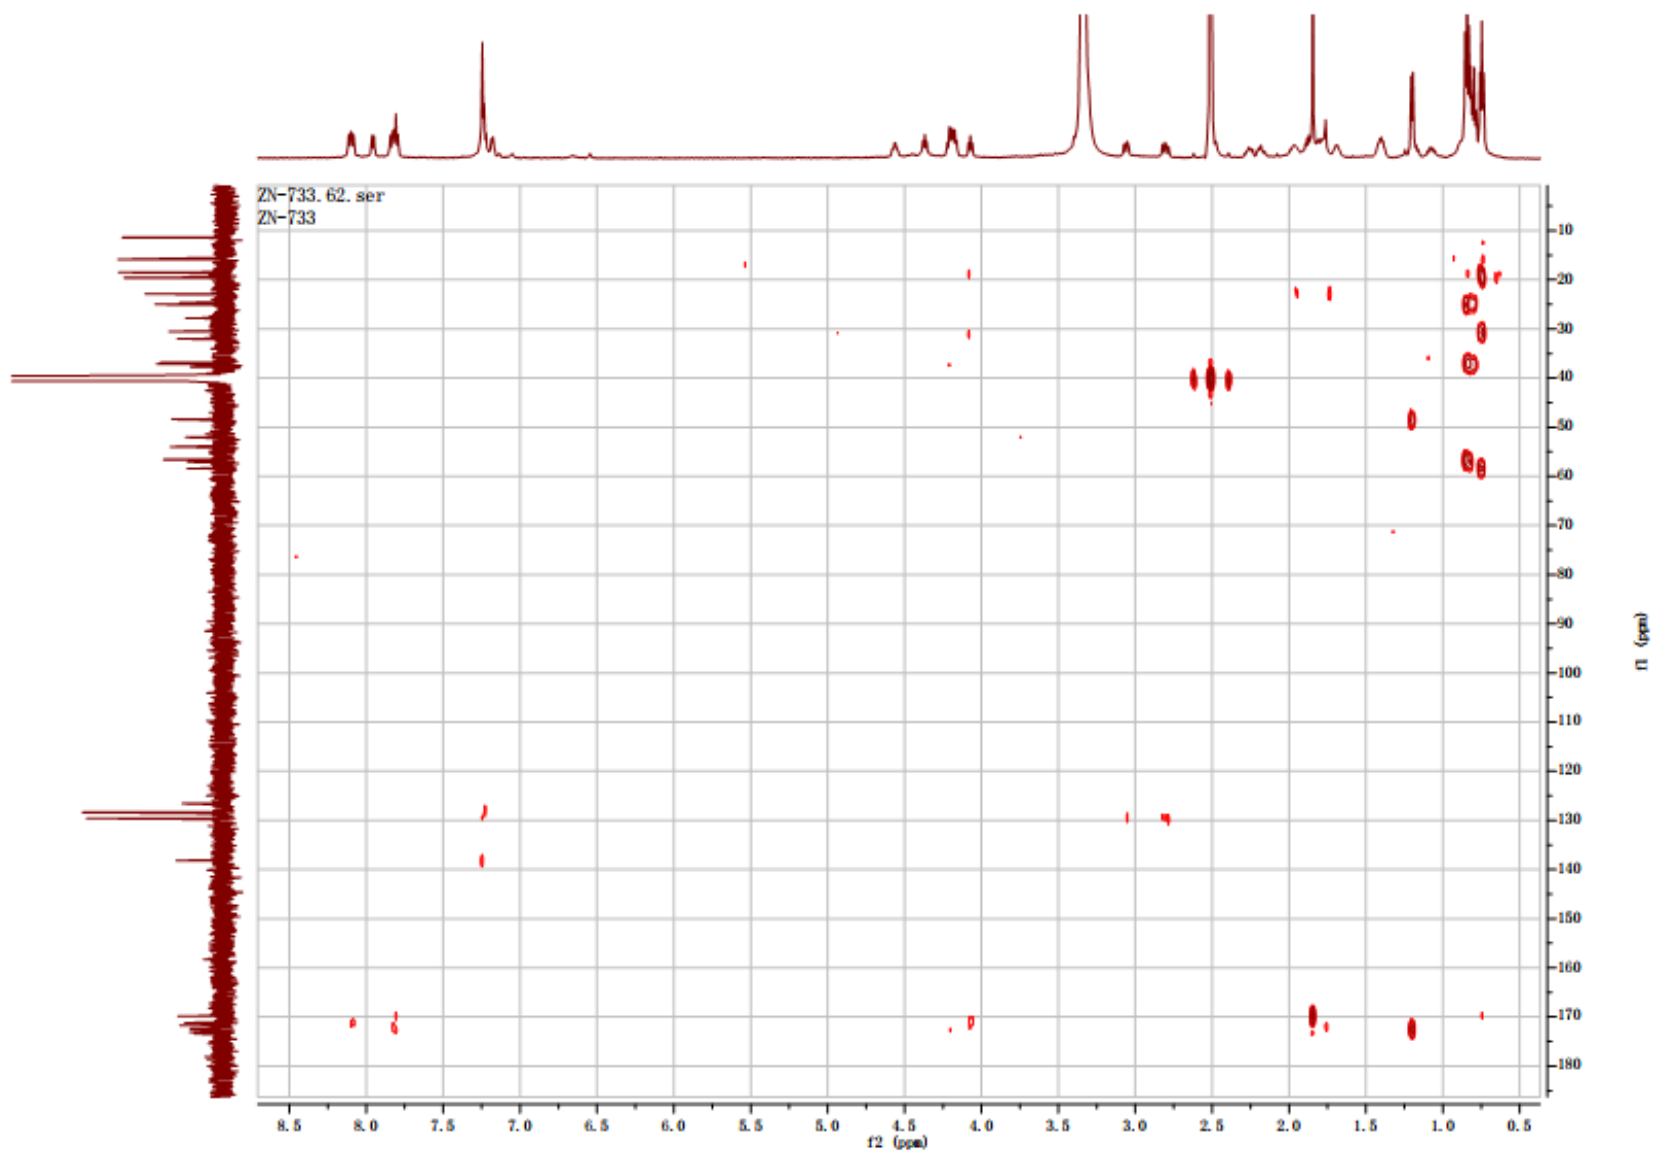

Supplementary Fig. 14. HMBC spectrum of **2a** in DMSO-*d*<sub>6</sub>

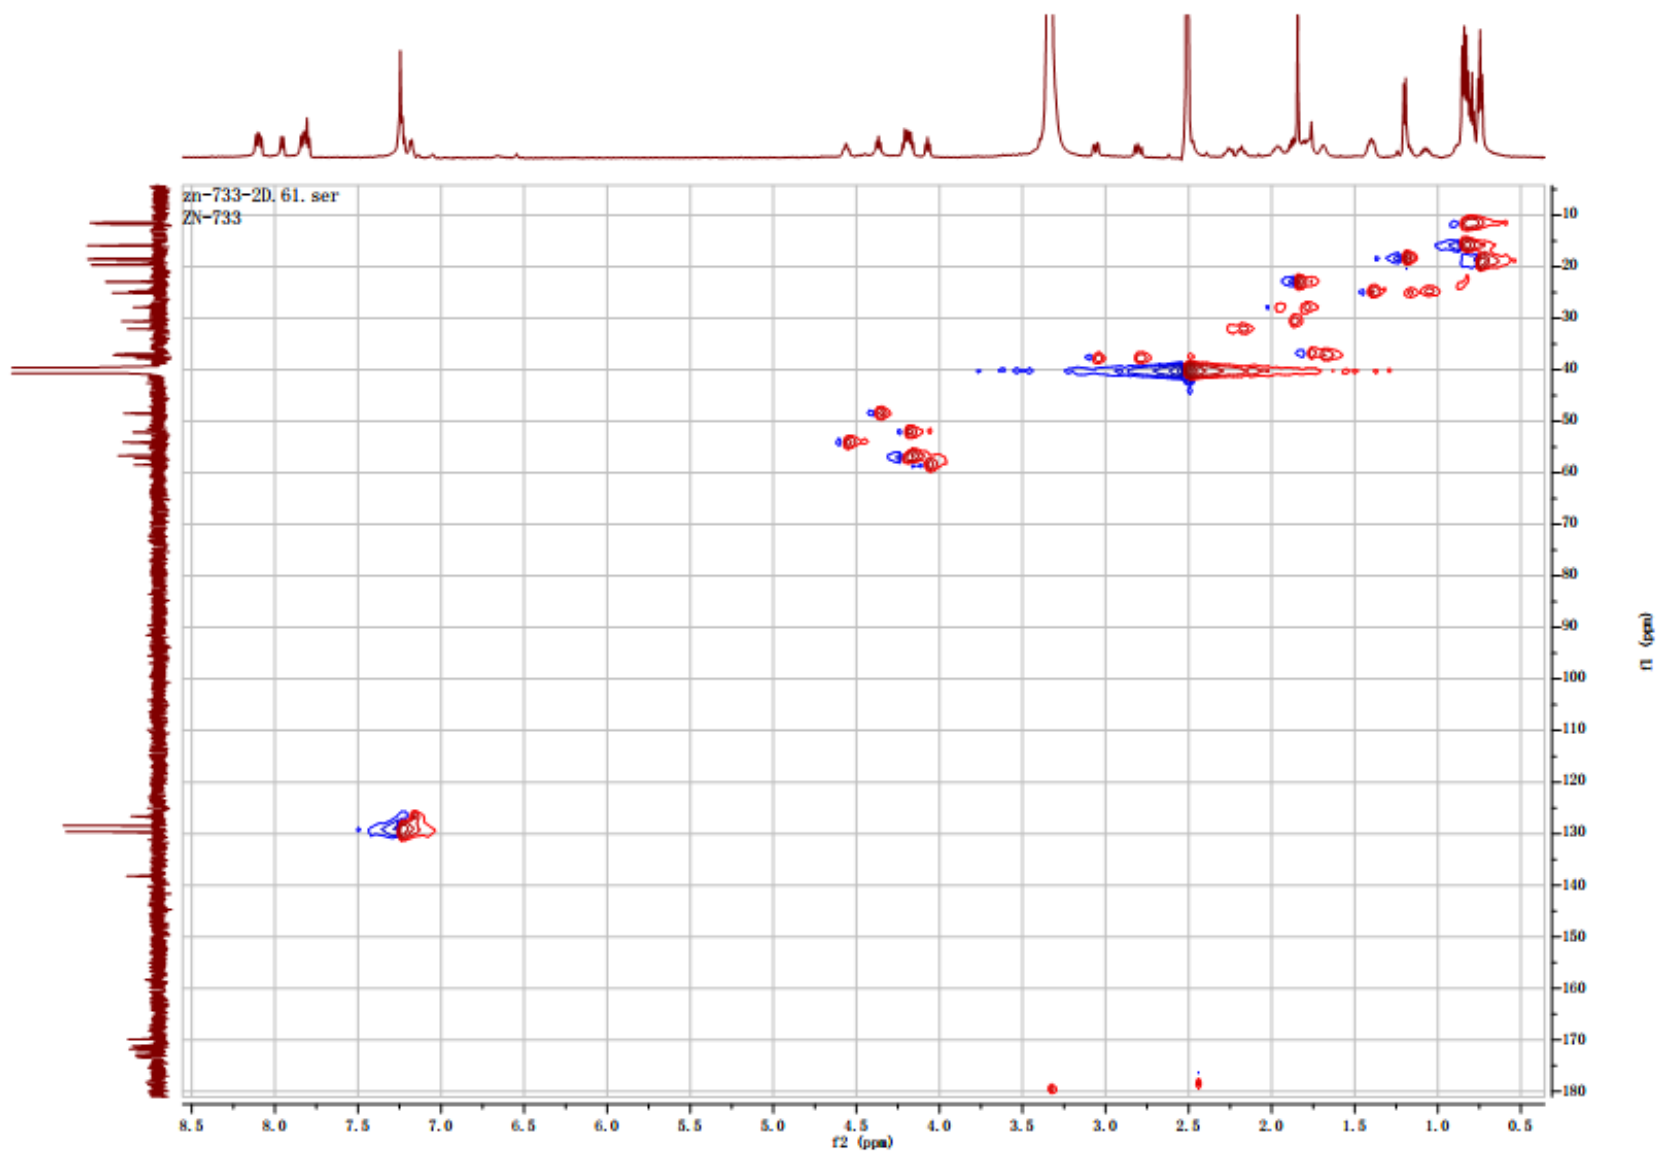

Supplementary Fig. 15. HSQC spectrum of **2a** in DMSO-*d*<sub>6</sub>

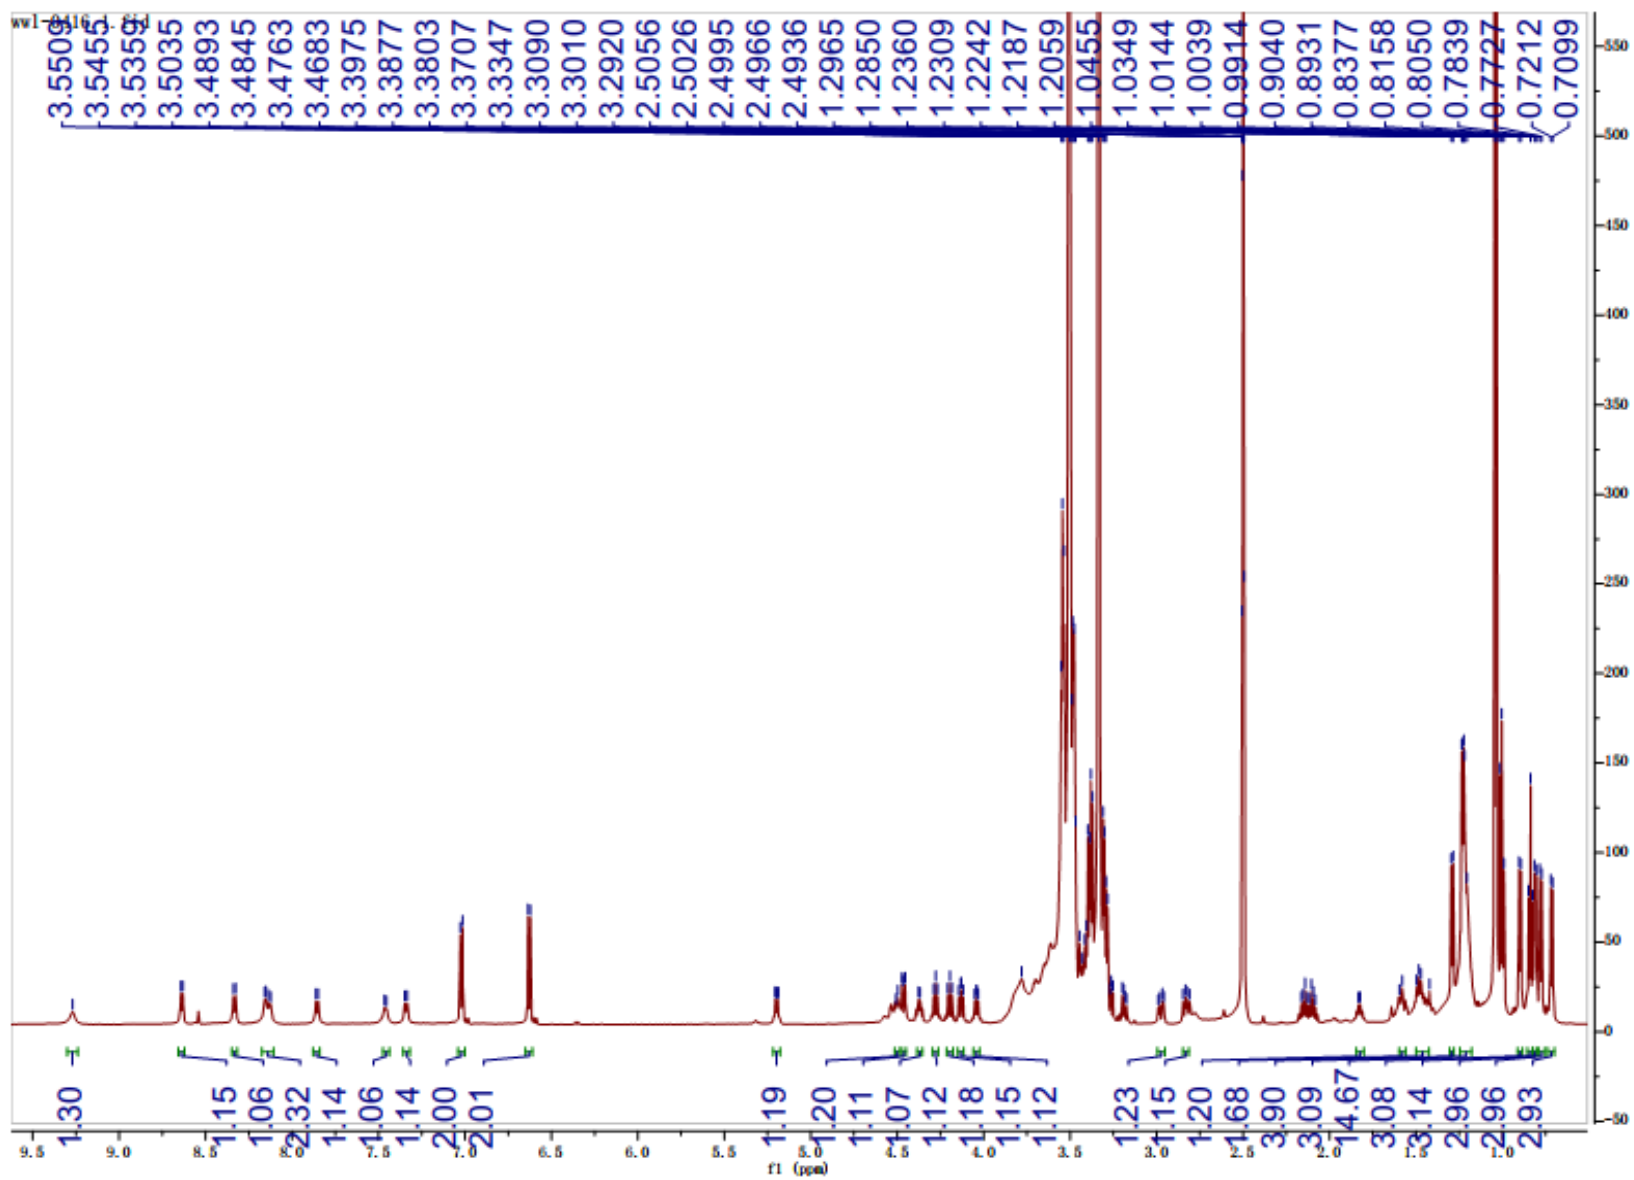

Supplementary Fig. 16.  $^1\text{H}$  NMR spectrum of **1d** in  $\text{DMSO-}d_6$



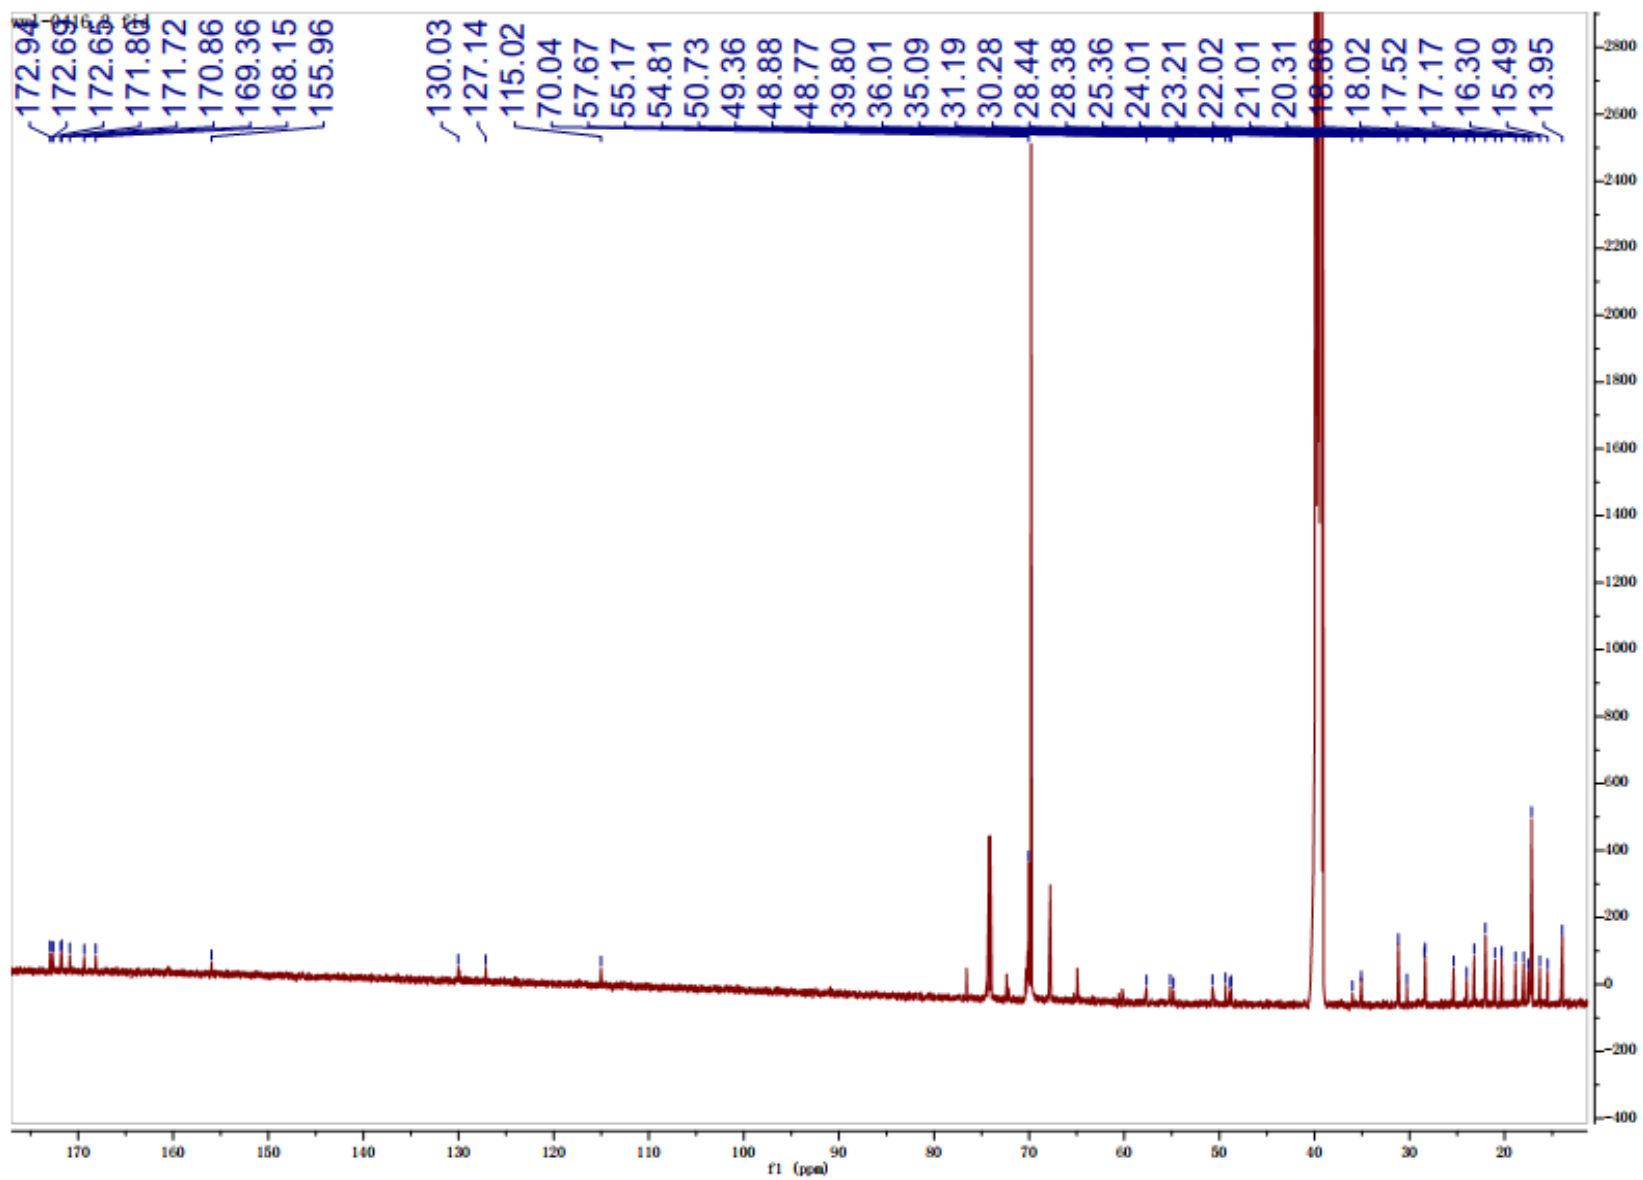

Supplementary Fig. 17. <sup>13</sup>C NMR spectrum of **1d** in DMSO-*d*<sub>6</sub>

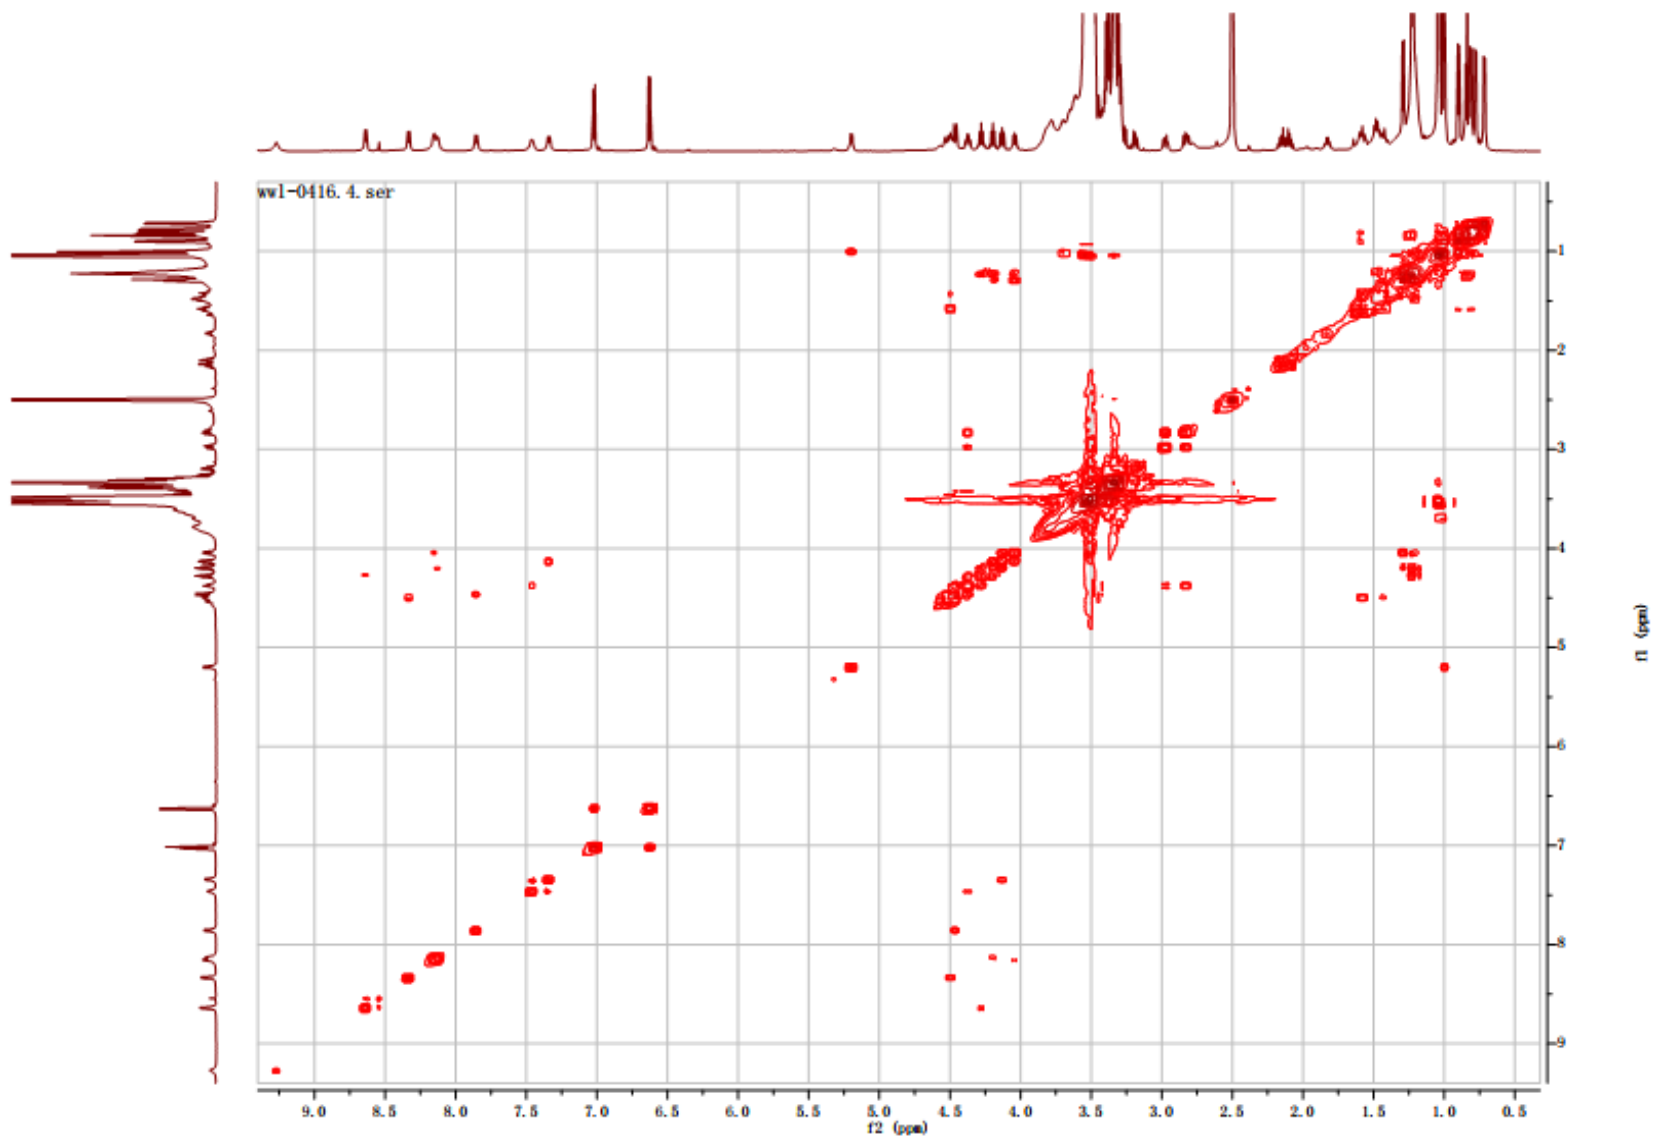

Supplementary Fig. 18.  $^1\text{H}$ - $^1\text{H}$  COSY spectrum of **1d** in  $\text{DMSO-}d_6$

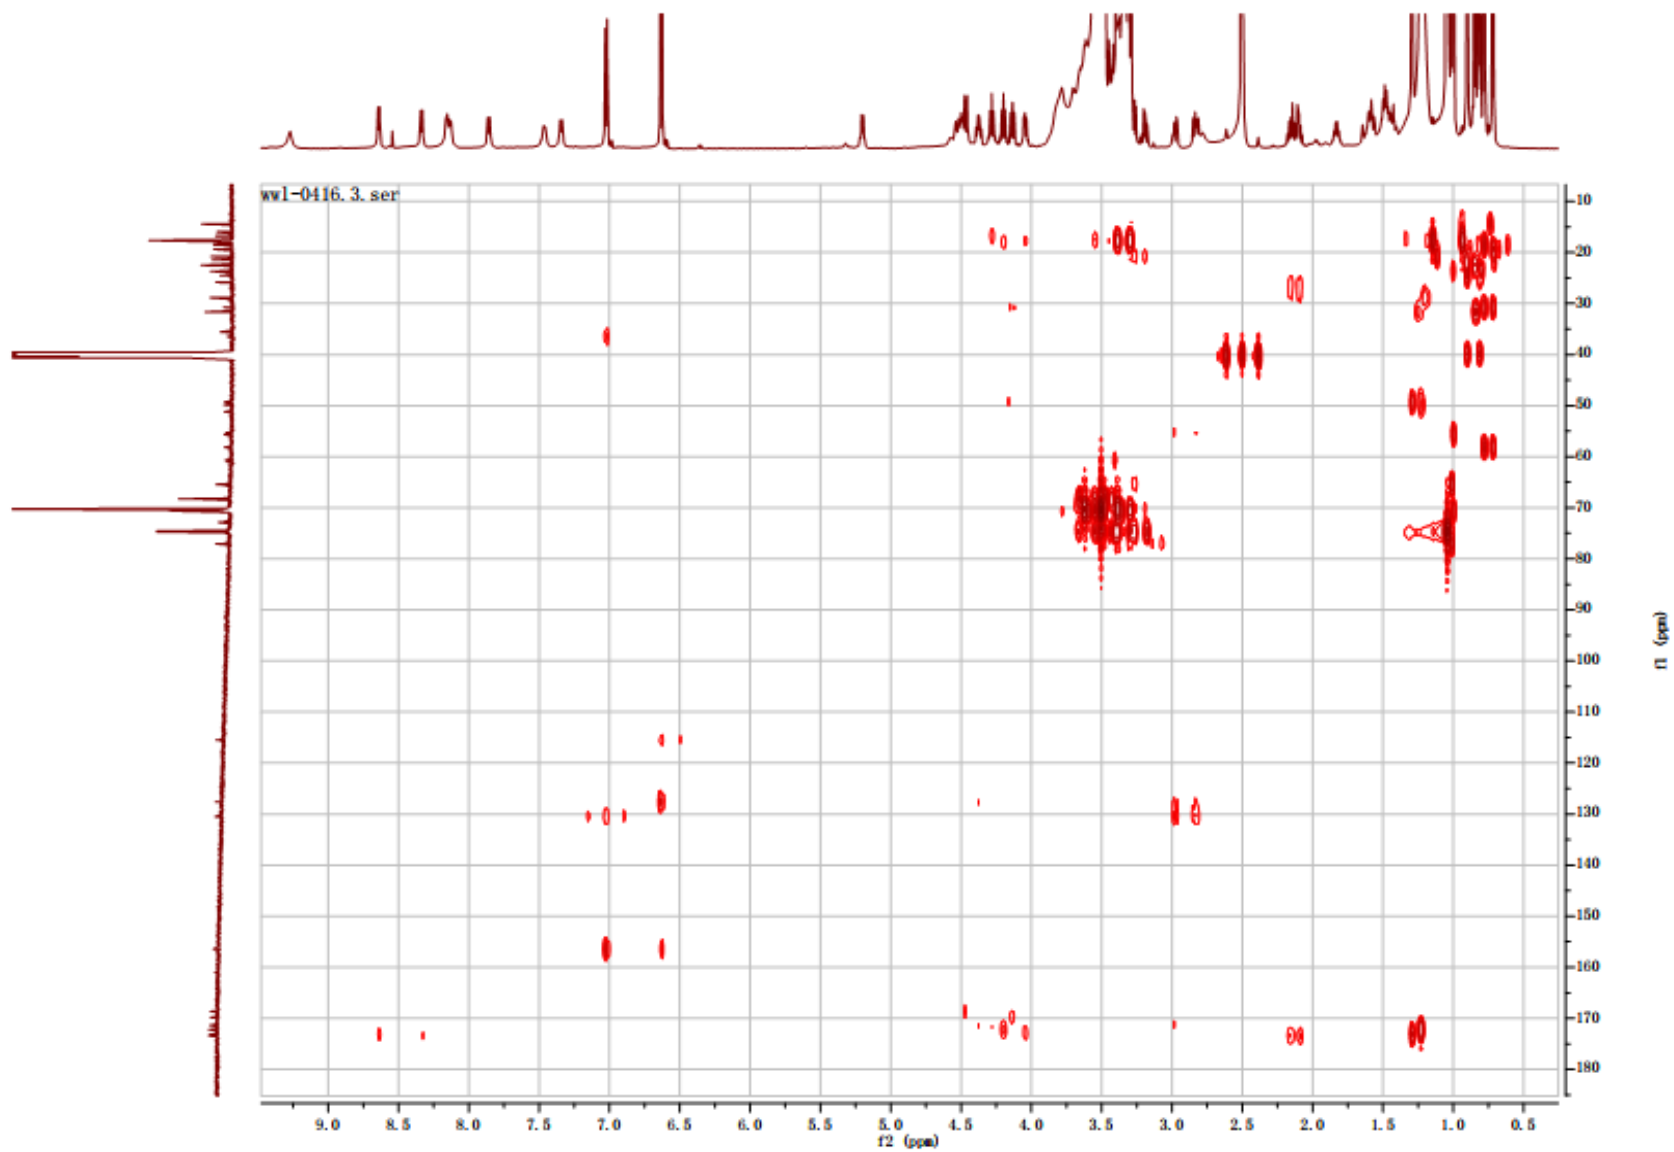

Supplementary Fig. 19. HMBC spectrum of **1d** in DMSO-*d*<sub>6</sub>

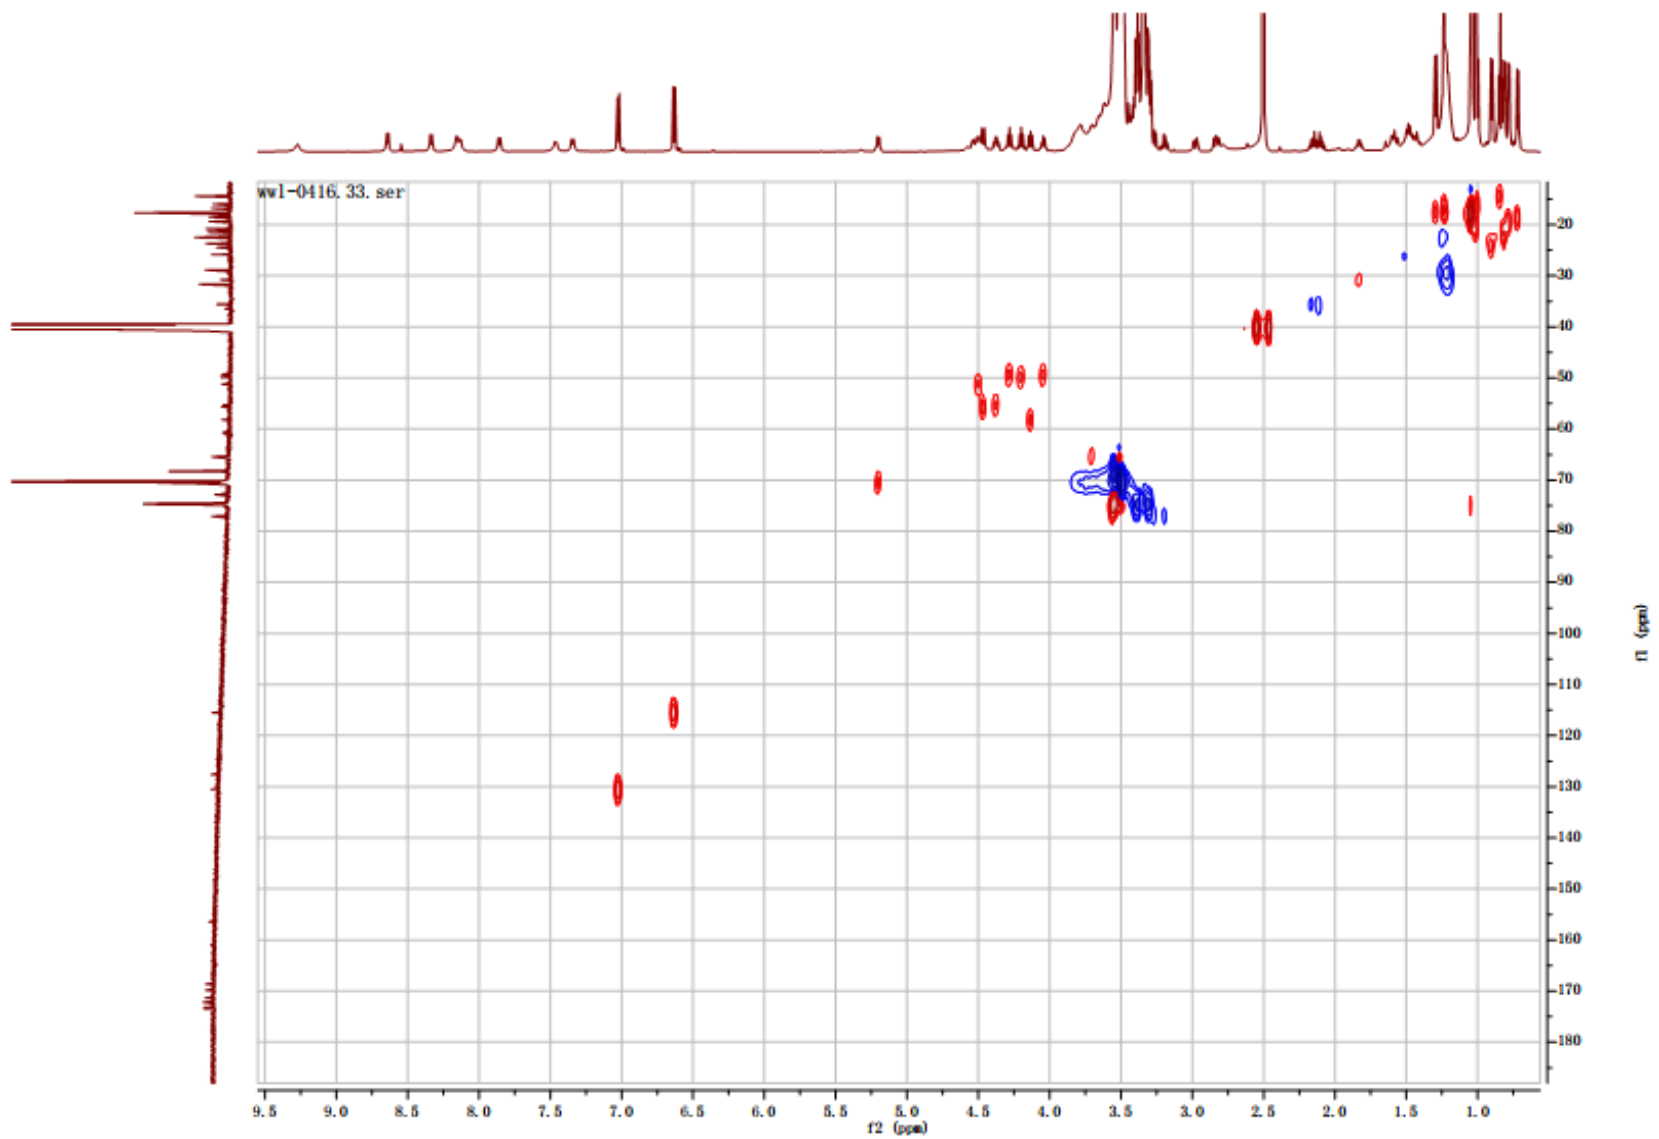

Supplementary Fig. 20. HSQC spectrum of **1d** in DMSO-*d*<sub>6</sub>

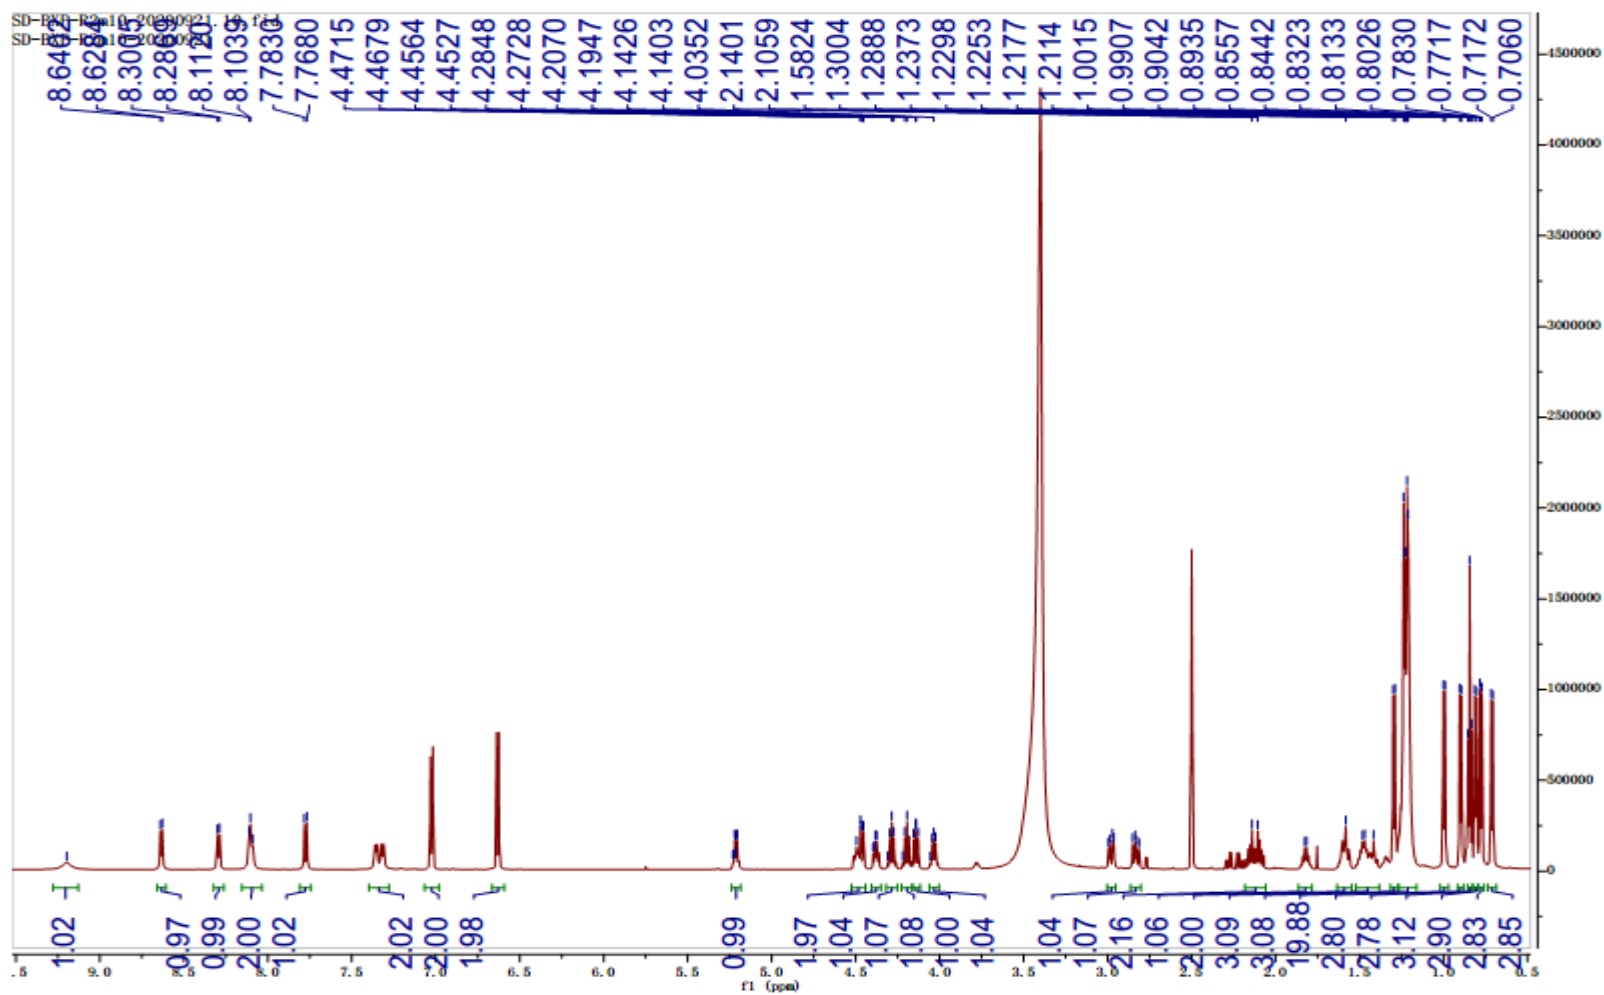

Supplementary Fig. 21.  $^1\text{H}$  NMR spectrum of **1e** in  $\text{DMSO-}d_6$

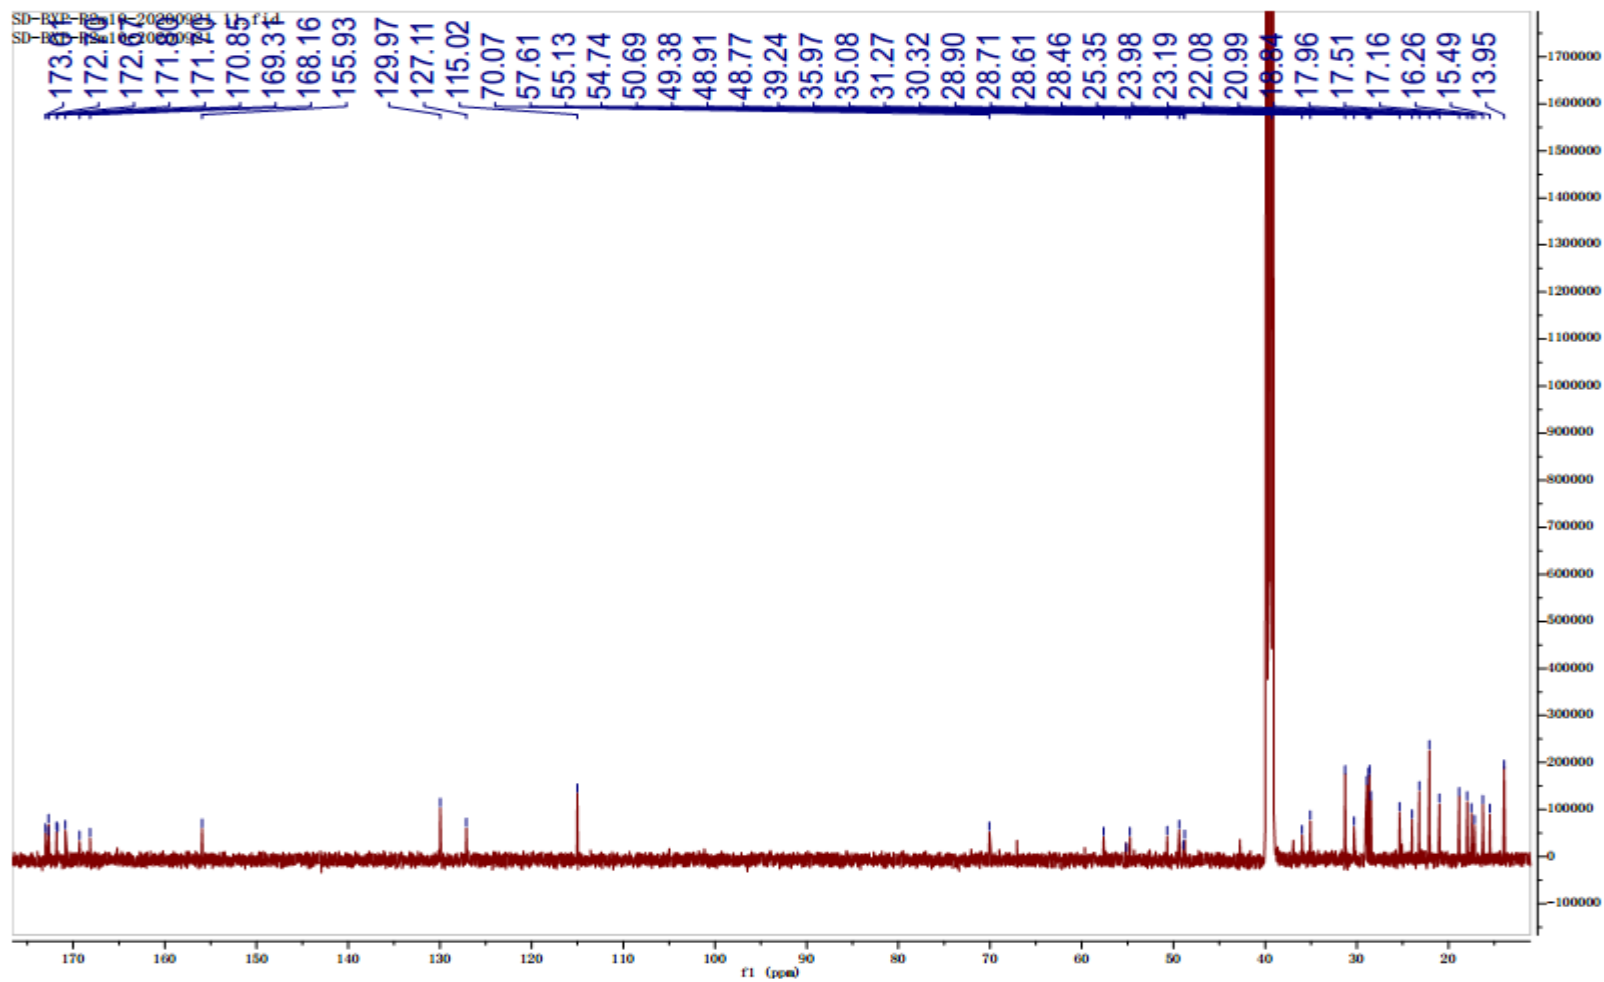

Supplementary Fig. 22.  $^{13}\text{C}$  NMR spectrum of **1e** in  $\text{DMSO-}d_6$

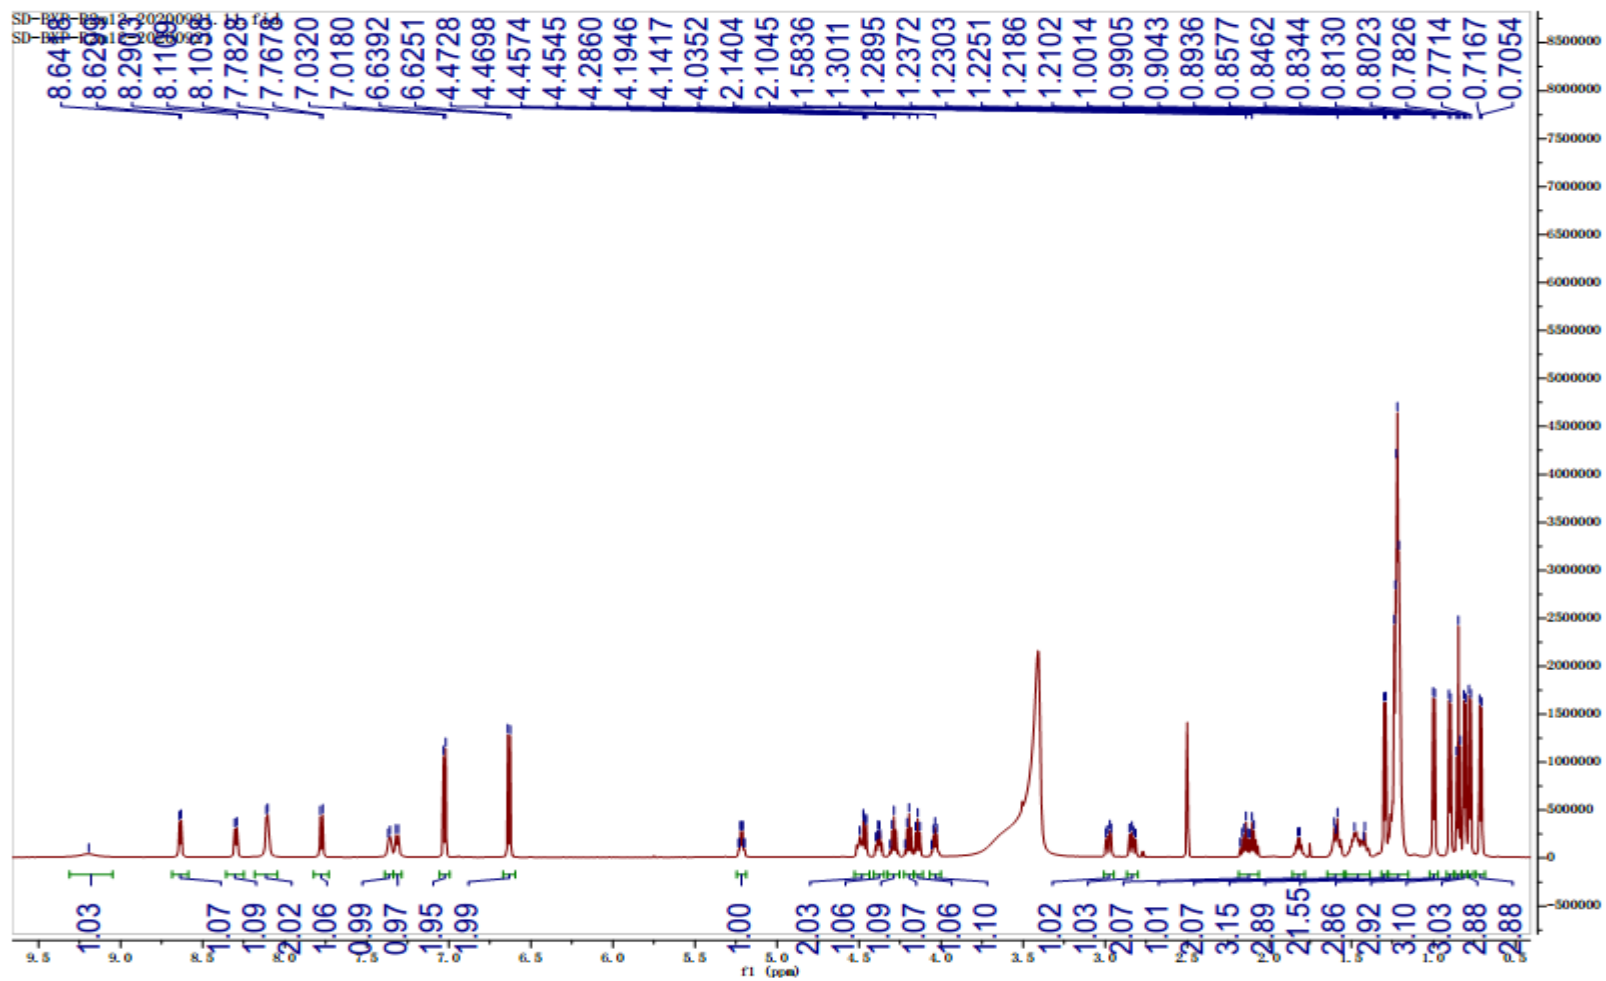

Supplementary Fig. 23.  $^1\text{H}$  NMR spectrum of **1f** in  $\text{DMSO-}d_6$

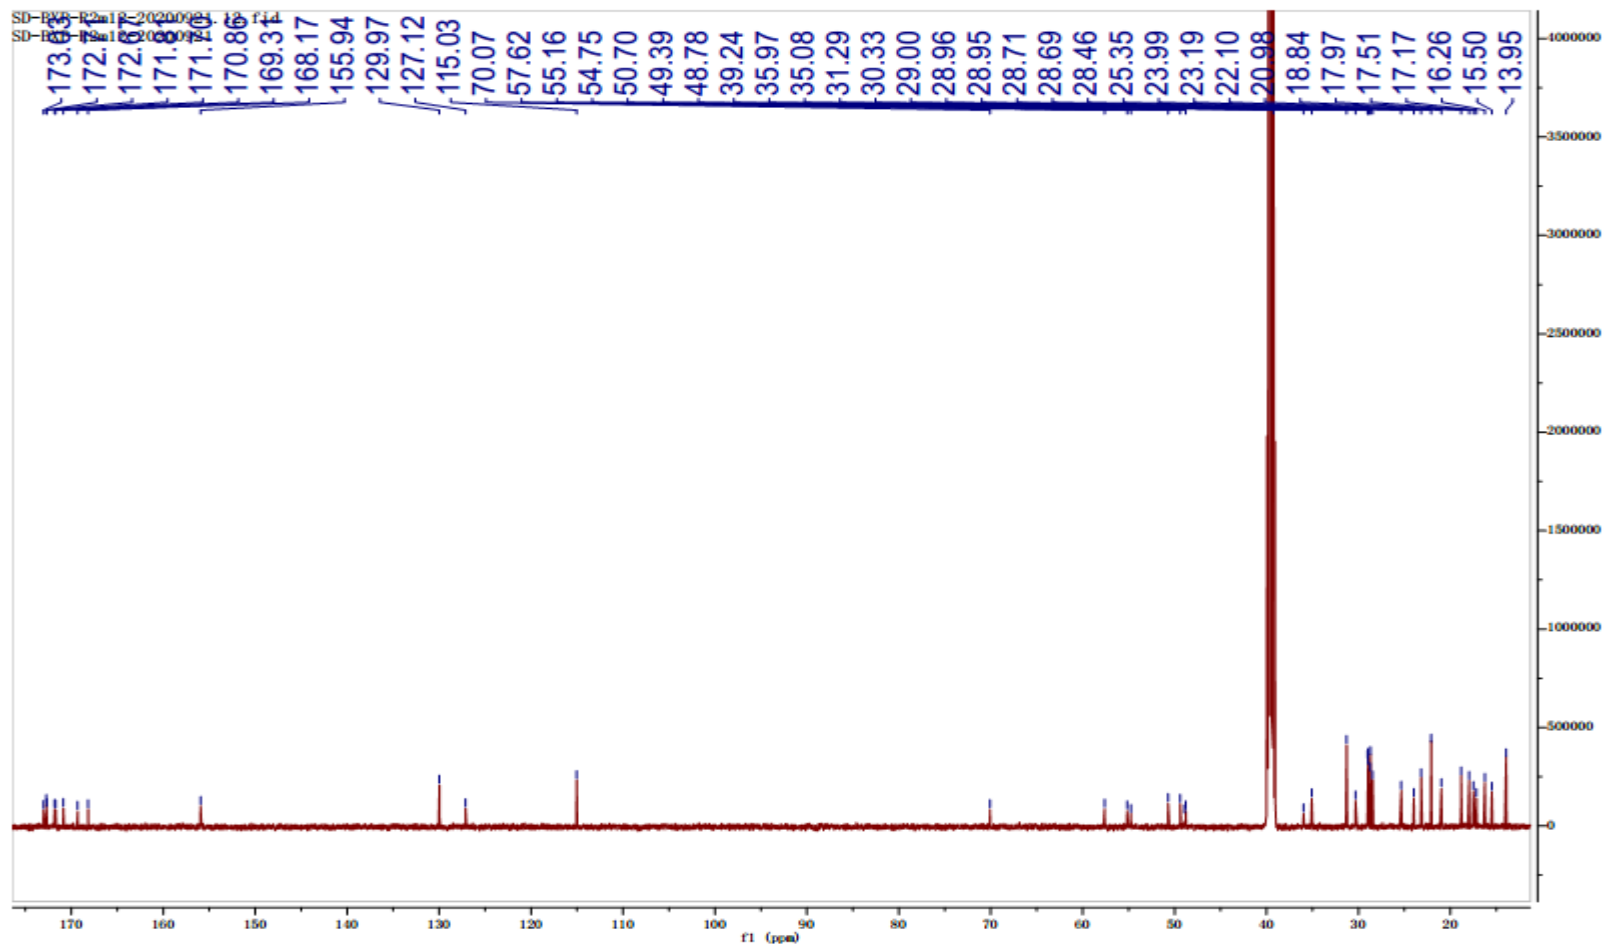

Supplementary Fig. 24.  $^{13}\text{C}$  NMR spectrum of **1f** in  $\text{DMSO-}d_6$



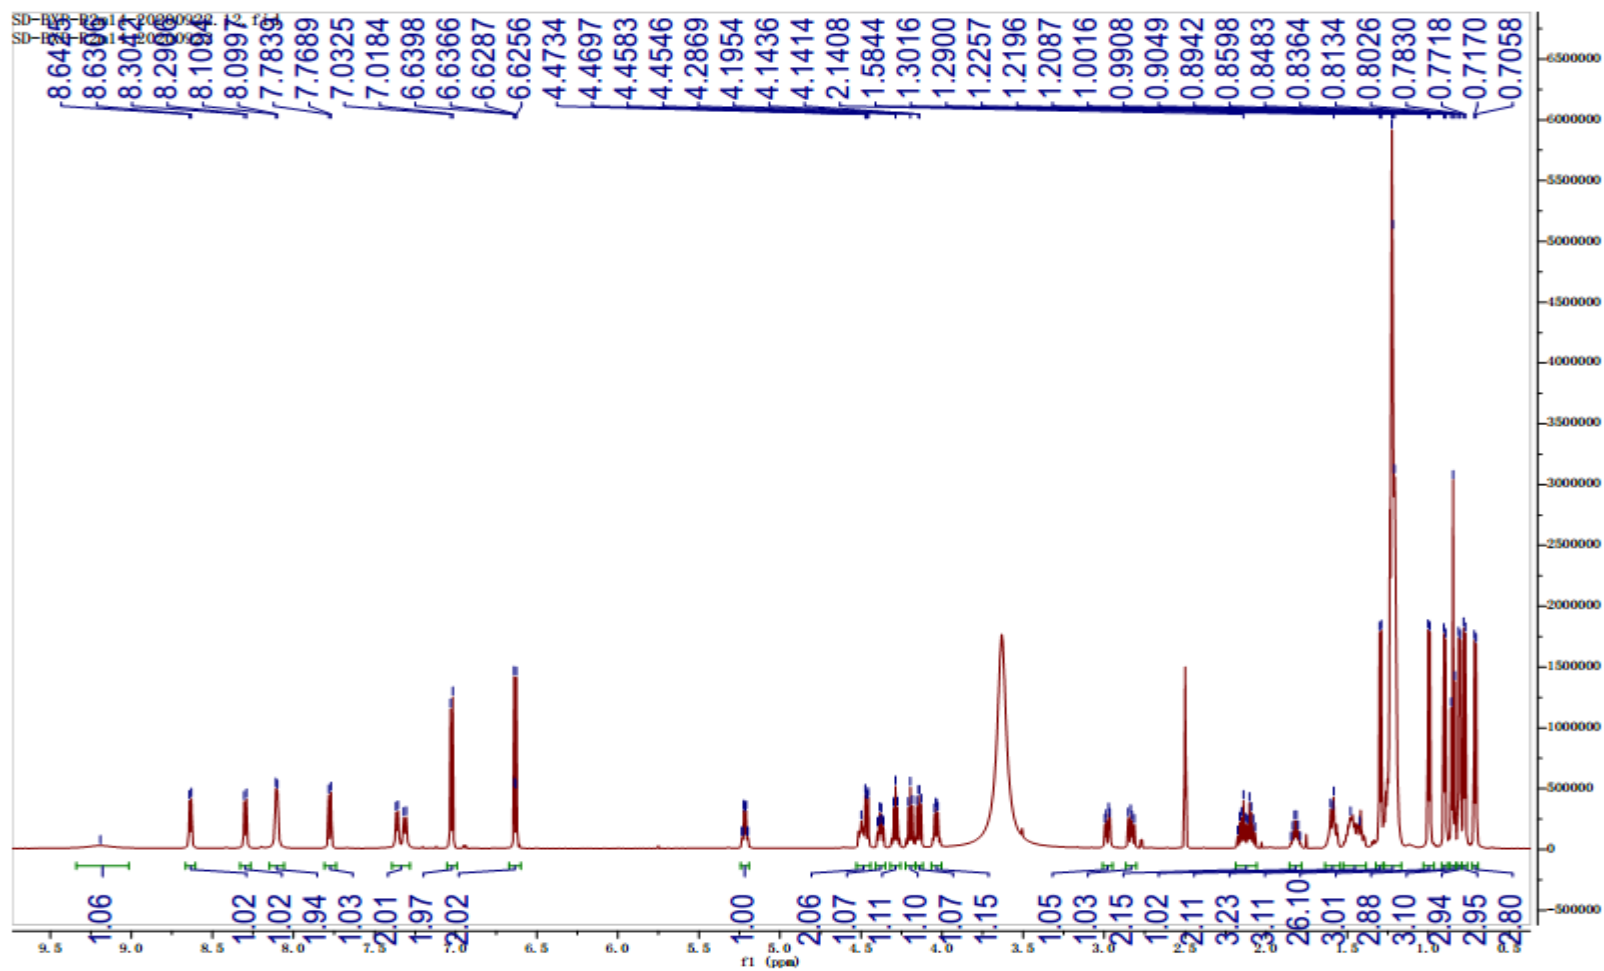

Supplementary Fig. 25.  $^1\text{H}$  NMR spectrum of **1g** in  $\text{DMSO-}d_6$

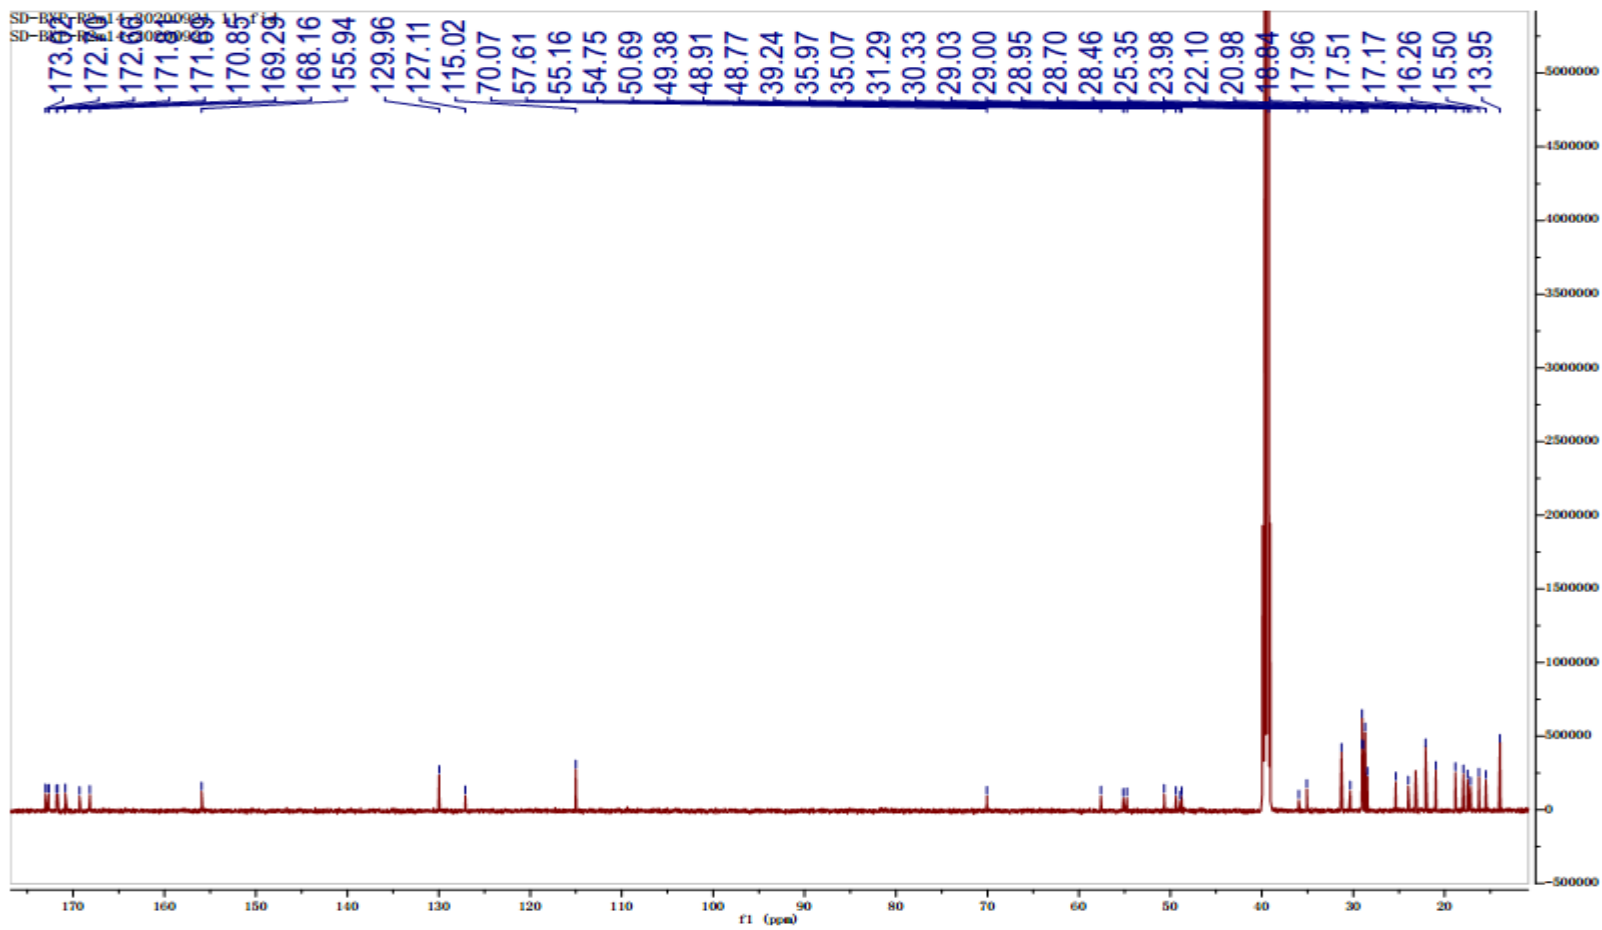

Supplementary Fig. 26.  $^{13}\text{C}$  NMR spectrum of **1g** in  $\text{DMSO-}d_6$

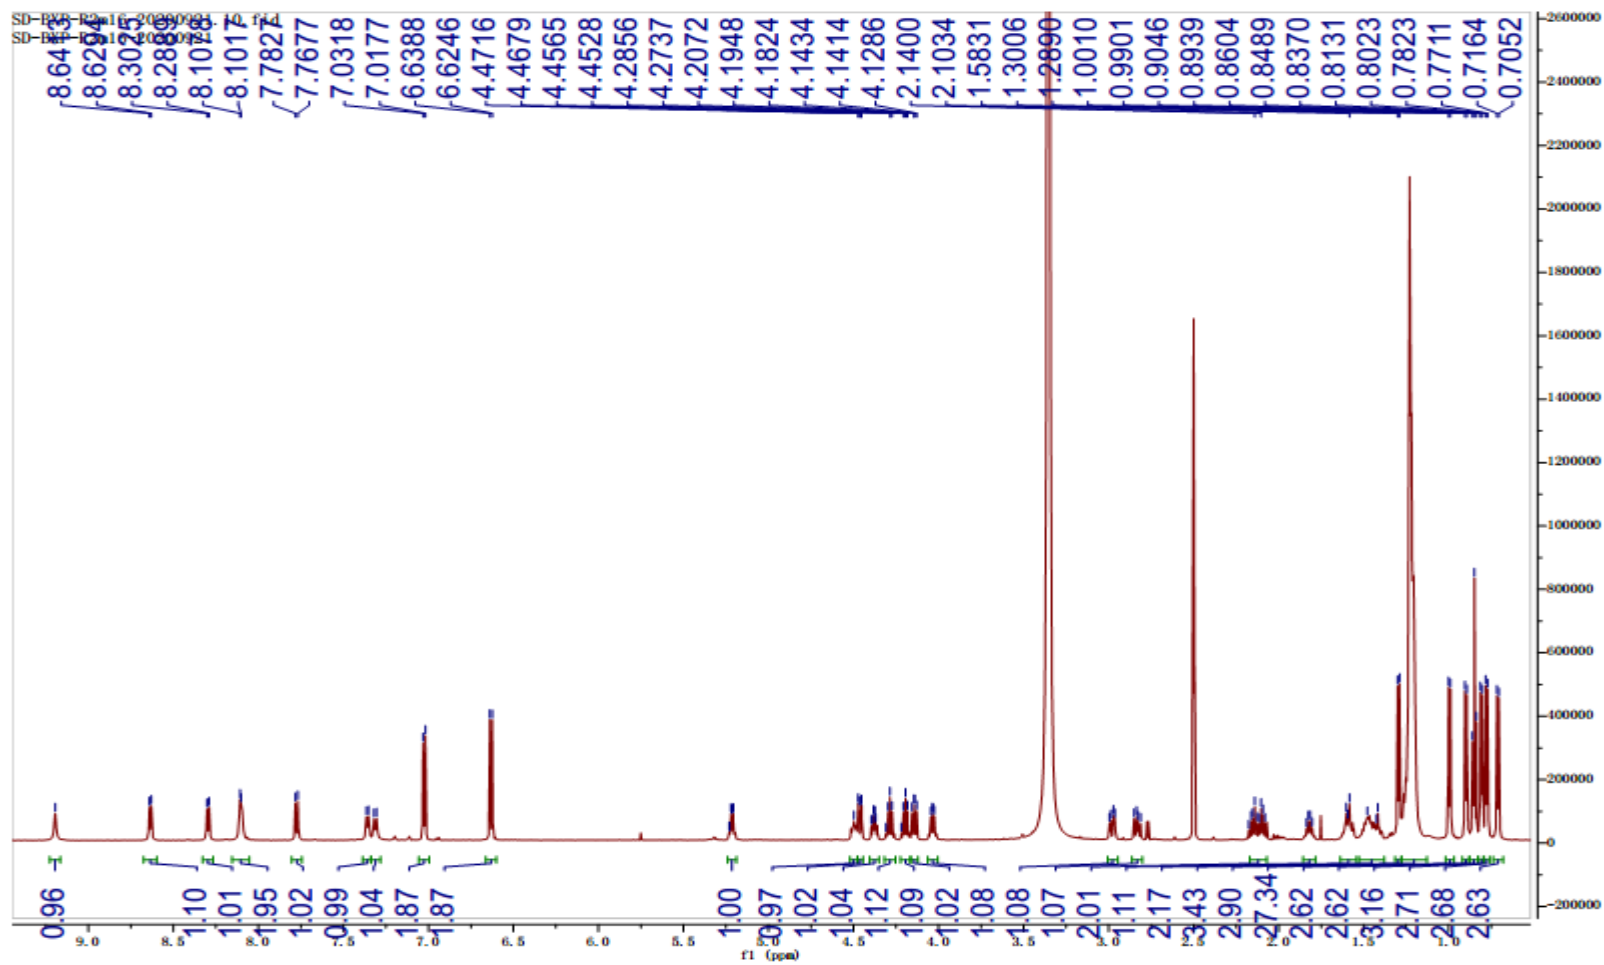

Supplementary Fig. 27.  $^1\text{H}$  NMR spectrum of **1h** in  $\text{DMSO-}d_6$

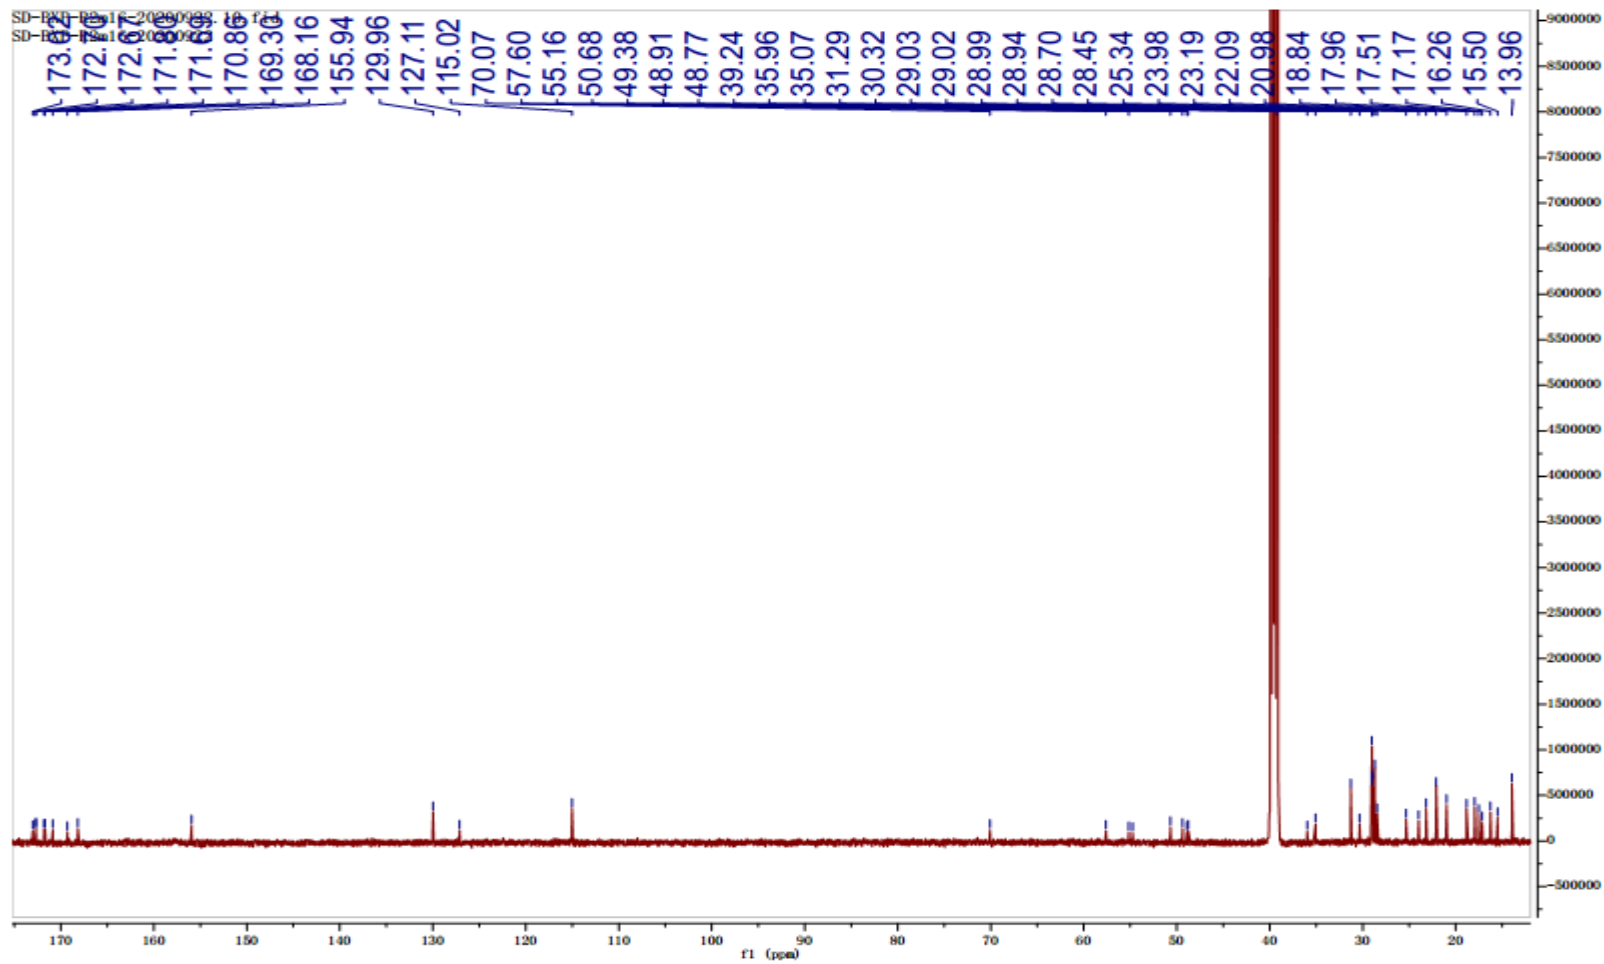

Supplementary Fig. 28.  $^{13}\text{C}$  NMR spectrum of **1h** in  $\text{DMSO-}d_6$

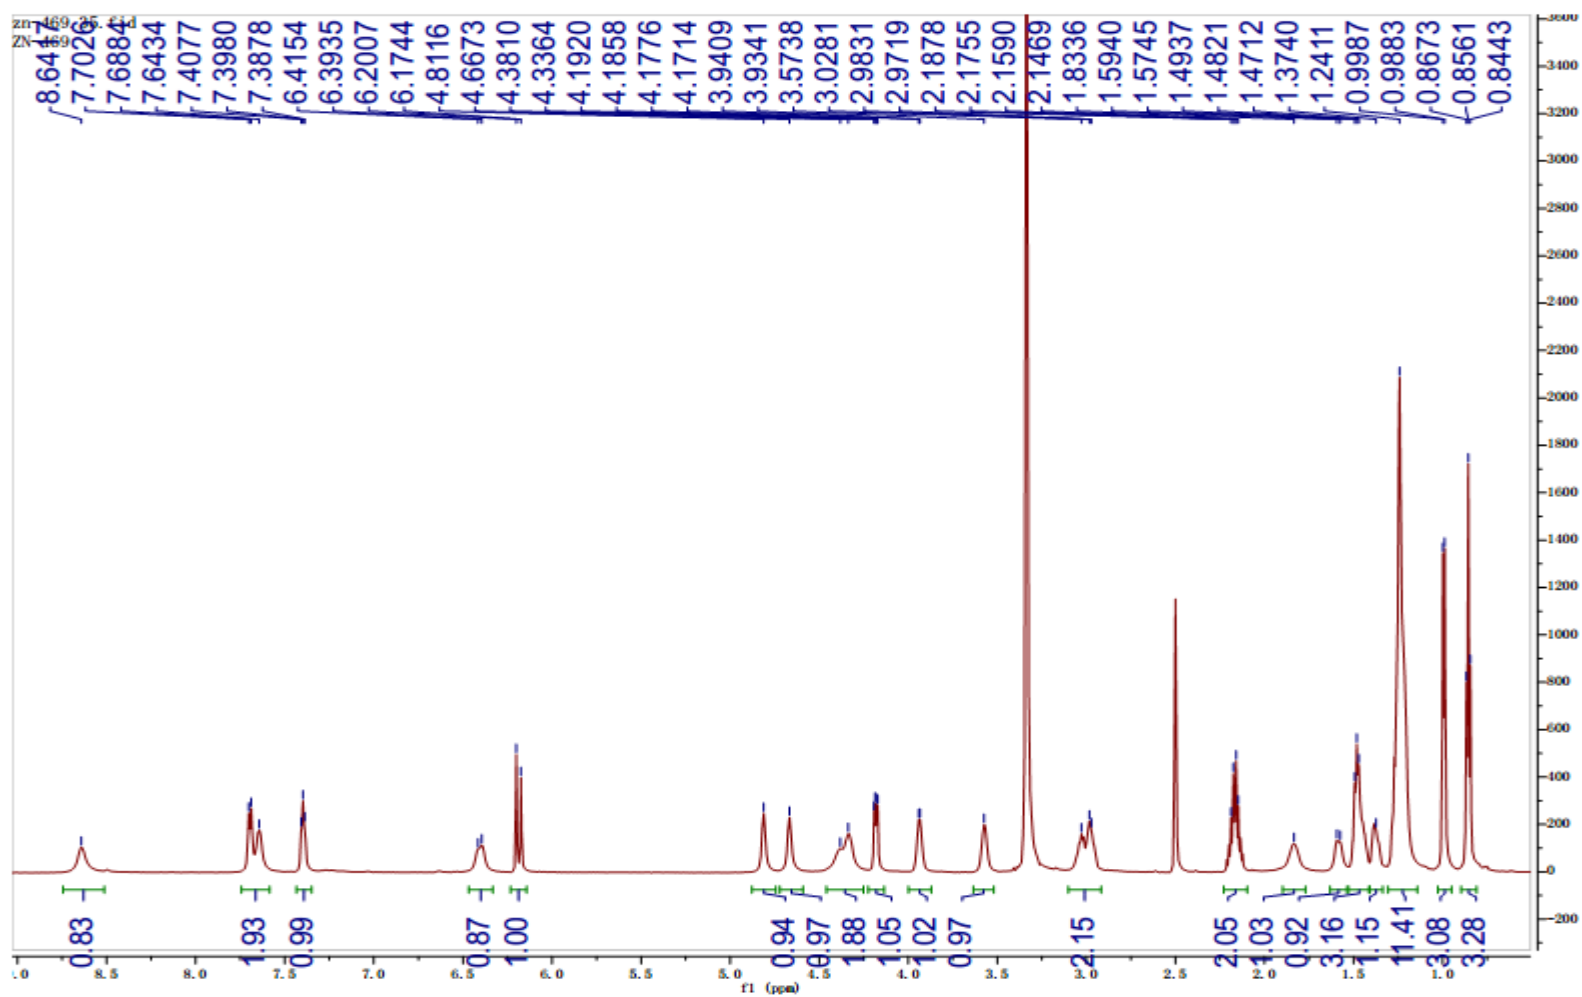

Supplementary Fig. 29.  $^1\text{H}$  NMR spectrum of **7b** in  $\text{DMSO-}d_6$

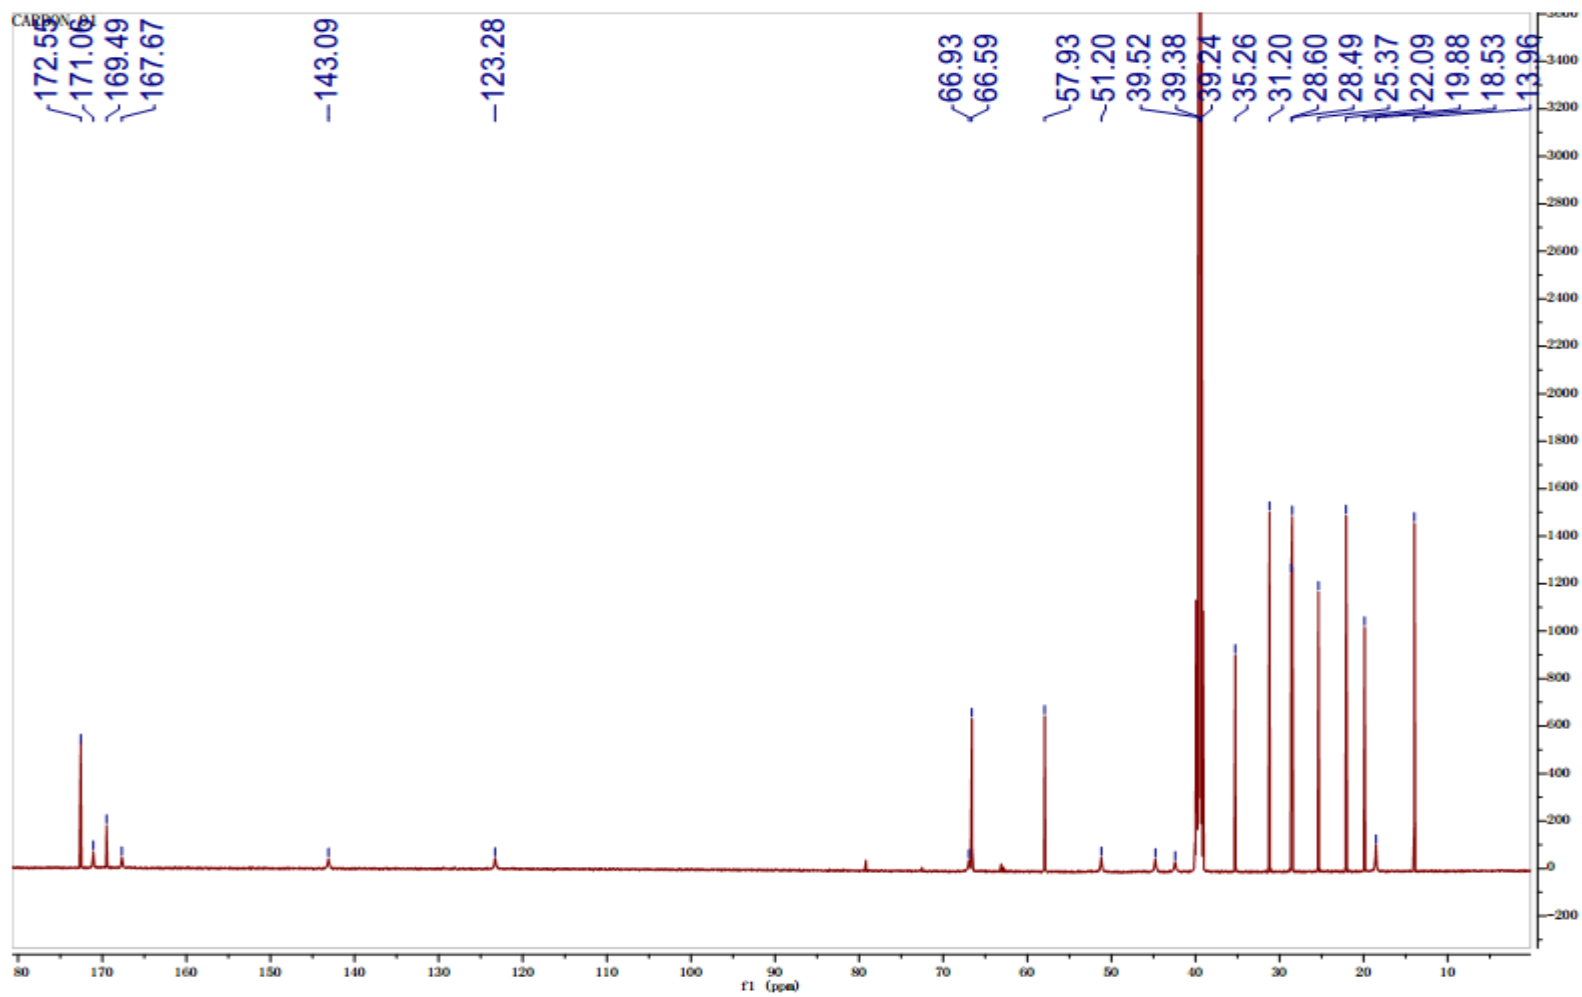

Supplementary Fig. 30. <sup>13</sup>C NMR spectrum of **7b** in DMSO-*d*<sub>6</sub>

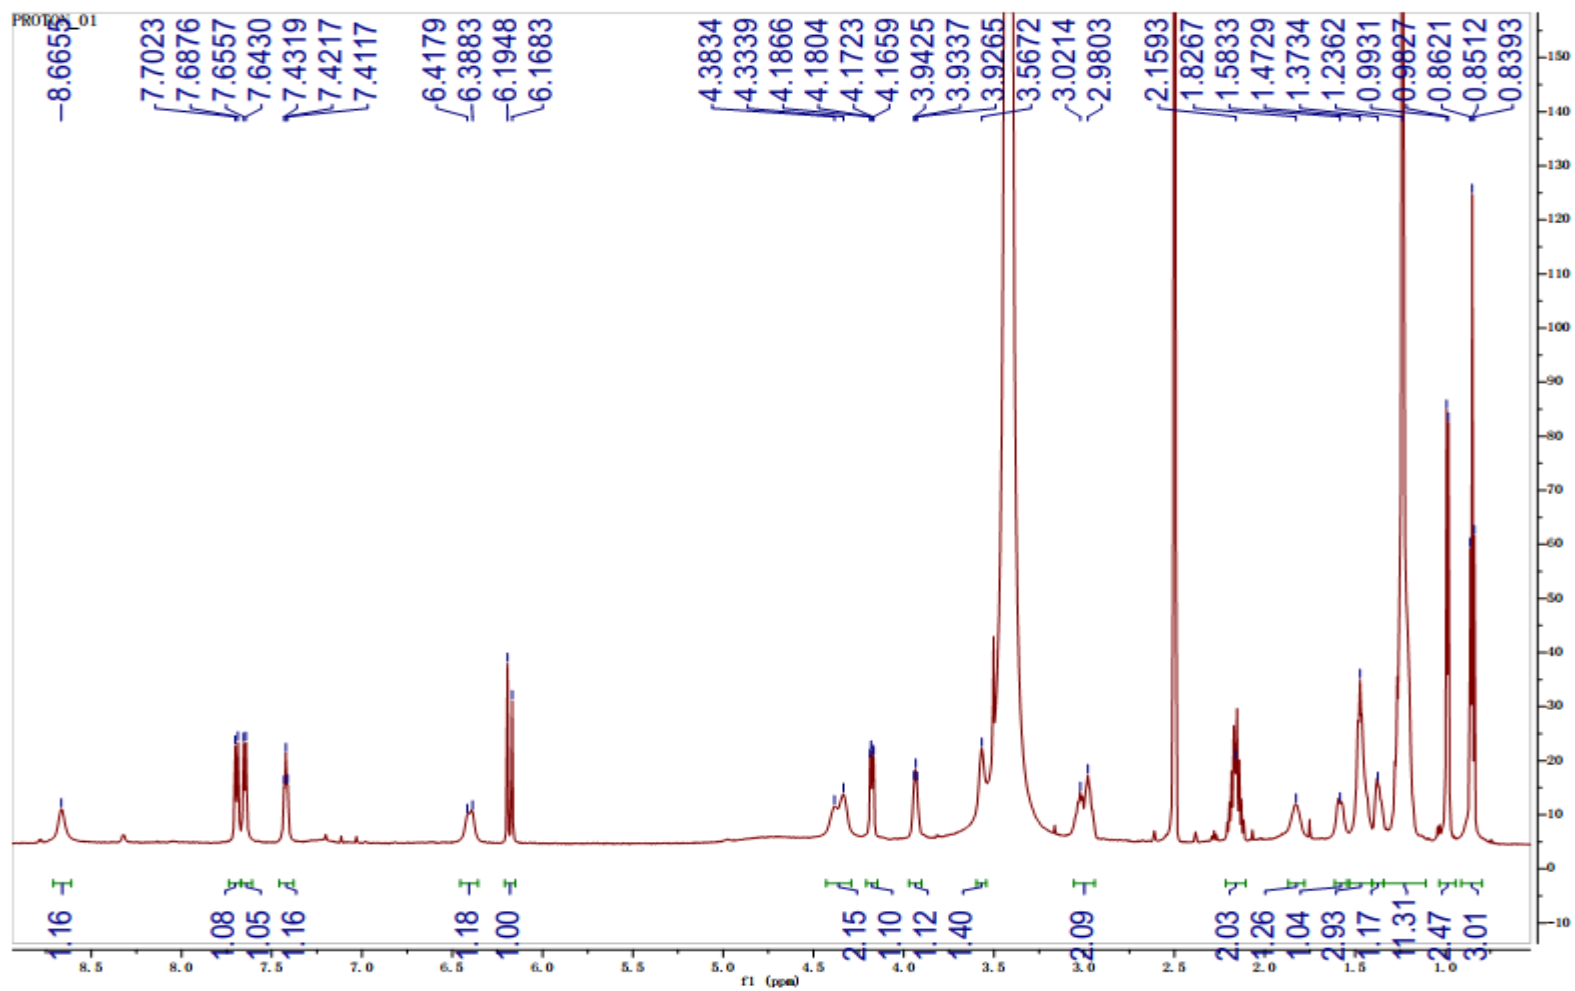

Supplementary Fig. 31.  $^1\text{H}$  NMR spectrum of **7c** in  $\text{DMSO-}d_6$

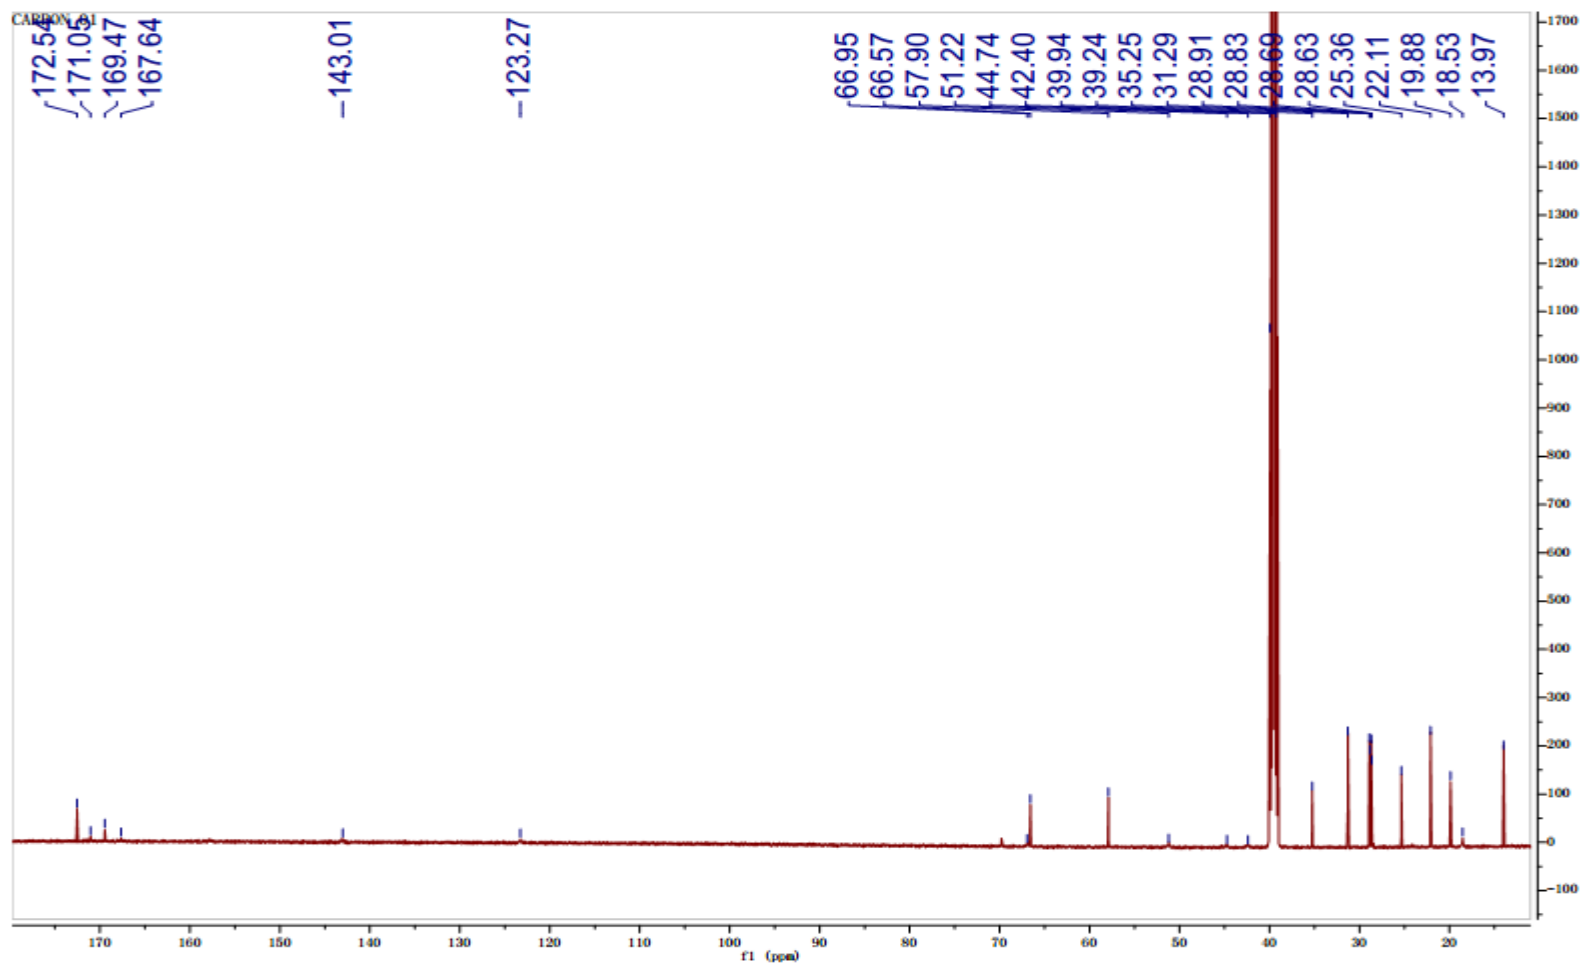

Supplementary Fig. 32.  $^{13}\text{C}$  NMR spectrum of 7c in  $\text{DMSO-}d_6$
