# Supplementary material for: Engineering and elucidation of the lipoinitiation process in nonribosomal peptide biosynthesis
Source: PubMed Central journal article supplement (PMC7804268; doi:10.1038/s41467-020-20548-8), 2021-01-12
Supplement: 41467_2020_20548_MOESM6_ESM.pdf [file 41467_2020_20548_MOESM6_ESM.pdf]

To view the full contents of this document, you need a later version of the PDF viewer. You can upgrade to the latest version of Adobe Reader from [www.adobe.com/products/acrobat/readstep2.html](http://www.adobe.com/products/acrobat/readstep2.html)

For further support, go to [www.adobe.com/support/products/acrreader.html](http://www.adobe.com/support/products/acrreader.html)
